# Supplementary material for: Between-hospital and between-neighbourhood variance in trauma outcomes: cross-sectional observational evidence from the Detroit metropolitan area
Source: PubMed Central journal article supplement — BMJ Open. 2018 Nov 25;8(11):e022090. doi: 10.1136/bmjopen-2018-022090 (PMC6254416; doi:10.1136/bmjopen-2018-022090), 2018-11-25
Supplement: bmjopen-2018-022090.draft_revisions.pdf [file bmjopen-2018-022090.draft_revisions.pdf]

# BMJ Open

BMJ Open is committed to open peer review. As part of this commitment we make the peer review history of every article we publish publicly available.

When an article is published we post the peer reviewers' comments and the authors' responses online. We also post the versions of the paper that were used during peer review. These are the versions that the peer review comments apply to.

The versions of the paper that follow are the versions that were submitted during the peer review process. They are not the versions of record or the final published versions. They should not be cited or distributed as the published version of this manuscript.

BMJ Open is an open access journal and the full, final, typeset and author-corrected version of record of the manuscript is available on our site with no access controls, subscription charges or pay-per-view fees (<http://bmjopen.bmj.com>).

If you have any questions on BMJ Open's open peer review process please email [info.bmjopen@bmj.com](mailto:info.bmjopen@bmj.com)

# BMJ Open

## **Between-hospital and between-neighborhood variance in trauma outcomes: Cross-sectional observational evidence from the Detroit metropolitan area**

|                               |                                                                                                                                                                                                                                                           |
|-------------------------------|-----------------------------------------------------------------------------------------------------------------------------------------------------------------------------------------------------------------------------------------------------------|
| Journal:                      | <i>BMJ Open</i>                                                                                                                                                                                                                                           |
| Manuscript ID                 | bmjopen-2018-022090                                                                                                                                                                                                                                       |
| Article Type:                 | Research                                                                                                                                                                                                                                                  |
| Date Submitted by the Author: | 01-Feb-2018                                                                                                                                                                                                                                               |
| Complete List of Authors:     | Sall, Lauren; St. John Hospital & Medical Center, Surgery<br>Hayward, R. David; St. John Hospital & Medical Center, Surgery<br>Fessler, Mary; St. John Hospital & Medical Center, Surgery<br>Edhayan, Elango; St. John Hospital & Medical Center, Surgery |
| Keywords:                     | ACCIDENT & EMERGENCY MEDICINE, Quality in health care < HEALTH SERVICES ADMINISTRATION & MANAGEMENT, PUBLIC HEALTH, TRAUMA MANAGEMENT                                                                                                                     |
|                               |                                                                                                                                                                                                                                                           |

SCHOLARONE™  
Manuscripts

View Only

1  
2  
3 Between-hospital and between-neighborhood variance in trauma outcomes: Cross-sectional  
4  
5 observational evidence from the Detroit metropolitan area  
6  
7  
8  
9  
10  
11

12 Lauren Sall, MD

13  
14 R. David Hayward, PhD\*

15  
16 Mary M. Fessler, BA

17  
18 Elango Edhayan, MD, FACS  
19  
20  
21  
22

23 St. John Hospital & Medical Center

24  
25 Department of Surgery

26  
27 Detroit, MI

28  
29 USA  
30  
31  
32  
33  
34  
35  
36  
37

38 WORD COUNT: 1,883

39  
40 KEY WORDS: traumatic injury; health inequalities; neighborhoods; trauma outcomes  
41

42 Direct Correspondence to:

43 R. David Hayward, PhD

44 Senior Medical Researcher

45 Department of Surgery

46 St. John Hospital & Medical Center

47 22151 Moross Rd., PB 1, Suite. 212

48 Detroit, MI 48236

49 USA

50 Phone: (313) 343-3485

51 Email: Richard.Hayward@ascension.org  
52  
53  
54  
55  
56  
57  
58  
59  
60

## ABSTRACT

**OBJECTIVES:** Disparities in treatment outcomes for traumatic injury are an important concern for care providers and policy makers. Factors that may influence these disparities include differences in risk exposure based on neighborhood of residence, and differences in quality of care between hospitals in different areas. This study examines geographic disparities within a single region: the Detroit metropolitan area.

**DESIGN:** Data on all trauma admissions between 2006 and 2014 were obtained from the Michigan State Inpatient Database. Admissions were grouped by patient neighborhood of residence and admitting hospital. Generalized Linear Mixed Modeling procedures were used to determine the extent of shared variance based on these two levels of categorization on three outcomes. Patients with trauma due to common mechanisms (falls, firearms, and motor vehicle traffic) were examined as additional subgroups.

**SETTING:** 143 hospitals admitting patients for traumatic injury in the Detroit metropolitan area during the period from 2006 – 2014.

**PARTICIPANTS:** 404,675 adult patients admitted for treatment of traumatic injury.

**OUTCOME MEASURES:** In-hospital mortality, length of stay, and cost of care.

**RESULTS:** Intraclass correlation coefficients indicated that there was substantial shared variance in outcomes based on hospital, but not based on neighborhood of residence. Among all injury types, hospital-level differences accounted for 15.4% of variance in mortality risk, 36.2% of variance in length of stay, and 37.7% of variance in cost of care. Hospital variance in mortality was highest for firearm trauma (20.1%).

**CONCLUSIONS:** Based on these data, geographic disparities in trauma treatment outcomes were more strongly attributable to differences in access to quality hospital care than to risk

1  
2  
3 factors in the neighborhood environment. Transfer of high-risk cases, particularly firearm-related  
4  
5 trauma, to hospitals with greater institutional experience in the relevant area may help address  
6  
7 mortality disparities in particular.  
8  
9

## 10 11 12 STRENGTHS AND LIMITATIONS OF THIS STUDY 13

- 14 • Data covers all hospital admissions in a major metropolitan area over a 9-year period
- 15  
16 • Multi-level analysis allows decomposition of differences in patient outcomes shared  
17  
18 within neighborhood of residence and hospital of treatment
- 19  
20 • Range of outcomes including mortality, length of stay, and cost of care
- 21  
22 • Cannot assess mortality occurring before hospital admission
- 23  
24 • Differences in intake patterns may increase between-hospital variance  
25  
26  
27  
28  
29  
30  
31  
32  
33  
34  
35  
36  
37  
38  
39  
40  
41  
42  
43  
44  
45  
46  
47  
48  
49  
50  
51  
52  
53  
54  
55  
56  
57  
58  
59  
60

## INTRODUCTION

The persistence of disparities in patient outcomes is a serious challenge for the US health care system<sup>1</sup>. People with low incomes and members of racial and ethnic minority groups experience worse health outcomes across a broad spectrum, from lower birth weight<sup>2</sup> to greater risk of functional disability in older adulthood<sup>3</sup>. The causes of these disparities are complex and multifaceted, including differing levels of environmental exposure to health hazards<sup>4</sup>, cultural differences in health behaviors<sup>5</sup>, and unequal access to quality care<sup>6</sup>. Within the field of health disparities research, traumatic injury has received relatively little attention in comparison to areas such as chronic disease and infection<sup>7</sup>. Nevertheless, there is a significant body of evidence finding that factors including race<sup>7,8</sup> and socioeconomic status<sup>9,10</sup> may affect patients' risk of negative outcomes following trauma treatment.

The local geography of cities may play an important role in forming these disparities. Cities in the US remain heavily segregated by both race and socioeconomic status, with sharp differences in the demographic makeup of neighborhoods that may be in close proximity to one another<sup>11</sup>. These neighborhoods may differ in terms of the risks they pose for traumatic injury. For example, socioeconomically-disadvantaged neighborhoods may have higher rates of trauma from causes like assault, which may entail greater risks of poorer outcomes. More broadly, residents of marginalized neighborhoods may face greater background health challenges, leaving them more likely to suffer from multiple comorbidities that are likely to complicate recovery from traumatic injury<sup>12,13</sup>.

A related facet of metropolitan geography potentially impacting trauma outcomes relates to hospital quality and access. Quality of care issues are an increasing concern in the realm of public policy<sup>14</sup>. Large cities contain numerous hospitals providing emergency trauma care, and

1  
2  
3 most trauma patients are likely to be receive treatment at facilities in close proximity to the  
4 places in which they live. Hospitals and other health care facilities serving primarily poor and  
5 marginalized local populations may face challenges with funding levels and patient demands that  
6 inhibit care quality<sup>6,15</sup>. Insurance issues and patient familiarity may also serve to funnel high-risk  
7 patients towards under-resourced hospitals, as patients may be more likely to opt to seek care at  
8 institutions with which they are more familiar, and which they may perceive as less costly<sup>16</sup>.  
9  
10  
11  
12  
13  
14  
15  
16

17 The extent to which these two aspects of local geography within metropolitan areas—  
18 residential neighborhood and care facility – may be related to trauma outcomes has not been  
19 thoroughly assessed. In this study, we use data from all trauma patients admitted for traumatic  
20 injury to hospitals in the Detroit metropolitan area between 2006 and 2014 and apply statistical  
21 techniques to determine the extent to which three outcomes (mortality, length of hospital stay,  
22 and cost of care) differ as a function of (a) the neighborhoods in which patients reside, and (b)  
23 the hospital providing care. The Detroit metropolitan area has some of the highest levels of  
24 residential racial and ethnic segregation in the US, as well as some of the most extreme  
25 economic inequalities<sup>17</sup>. As a region that has experienced a historical pattern of economic decline  
26 and rejuvenation, as well as successive waves of movement between urban and suburban  
27 neighborhoods, it serves to exemplify a number of the socioeconomic challenges facing policy  
28 makers and health care providers in numerous US cities.  
29  
30  
31  
32  
33  
34  
35  
36  
37  
38  
39  
40  
41  
42  
43

#### 44 METHOD

45  
46 Individual-level admissions data for this project were obtained from the Healthcare Cost  
47 and Utilization Project (HCUP), sponsored by the Agency for Health Research and Quality  
48 (AHRQ). One element of the HCUP is the compilation of an annual database including medical  
49 details of all hospital discharges in each state, known as the State Inpatient Database (SID).  
50  
51  
52  
53  
54  
55  
56  
57  
58  
59  
60

1  
2  
3 Ethical approval for use of the data was granted by the Institutional Review Board of St. John  
4 Hospital and Medical Center. Because the data were derived from clinical patient records and  
5  
6 were fully anonymous and de-identified, participant consent was not required.  
7  
8  
9

10 Data for the present analyses come from the Michigan SID for the period of years from  
11  
12 2006 to 2014<sup>18</sup>. Patients residing in the Detroit Metropolitan Statistical Area (MSA) were  
13  
14 identified using the US Census Bureau definition as consisting of Wayne, Lapeer, Livingston,  
15  
16 Macomb, Oakland, and St. Clair counties. Trauma cases were identified using ICD-9 diagnostic  
17  
18 codes present at admission.  
19  
20

21 Hospitals. Each record in the SID includes a unique, anonymized, identification code  
22  
23 corresponding to the hospital to which the patient was admitted. This allows patients to be  
24  
25 clustered according to hospital. There were a total of 143 hospitals represented in the data, with a  
26  
27 median of 63 observations in each cluster.  
28  
29

30 Neighborhoods. Patient residence was identified by ZIP code in the SID, and in this study  
31  
32 each ZIP code is treated as a separate neighborhood. There were a total of 214 neighborhoods  
33  
34 represented in the data, with a median of 1,633 observations in each.  
35  
36

37 Patient outcomes. Patient outcomes include in-hospital mortality, length of stay, and total  
38  
39 cost of care. Mortality was derived from the case disposition code (0 = did not die, 1 = died).  
40  
41 Length of stay is given by the number of days between admission and discharge. Total cost is a  
42  
43 dollar amount corresponding to the total amount billed to any payer for each admission.  
44  
45

46 Trauma mechanism. Trauma mechanisms are derived from ICD-9 diagnosis codes  
47  
48 included for each admission case in the SID. The three most common specific mechanisms in  
49  
50 this sample were examined in these analyses: falls, firearms, and motor vehicle traffic.  
51  
52

53 Analytical approach  
54  
55  
56  
57  
58  
59  
60



1  
2  
3 In this study, we use a generalized linear mixed modeling (GLMM) framework to  
4 estimate the proportion of variance in individual outcomes that is attributable to each of three  
5 levels: hospitals, neighborhoods, and individuals (i.e., residual variance after hospital and  
6 neighborhood variance has been accounted for). The GLMM method<sup>19</sup> is a statistical modeling  
7 technique which includes a mixture of fixed and random effects. Random effects represent  
8 shared group-level linear relationships. Individual outcome values are allowed to vary at random  
9 around a group mean, allowing for an estimate of the part of the outcome that varies between  
10 groups and that varying between individuals. In these analyses, random intercept effects are  
11 specified for both hospital and neighborhood, meaning that individual outcomes are allowed to  
12 vary at random around both a hospital mean and a neighborhood mean. The group-level design  
13 matrix is specified as cross-classified, meaning that both sets of higher-level clusters are included  
14 in the same model, with each individual belonging to both a hospital and neighborhood cluster.  
15 Because the distributions of the outcome variables are not the same, different linking functions  
16 are used in GLMM models with different outcomes. Mortality is a binary variable, and uses a  
17 binary linking function. Length of stay and total cost both have highly skewed continuous  
18 distributions, making the use of a longnormal linking function appropriate.

19  
20 The proportion of variance at the group level is given by the intra-class correlation  
21 coefficient (ICC) corresponding to the level of clustering (in this case, hospital and  
22 neighborhood). For outcomes with a non-binary function (i.e., length of stay and total cost), the  
23 ICC is computed by dividing the group-level variance parameter by the sum of the group and  
24 residual variance parameters. For binary GLMM (i.e., mortality), the ICC is given by dividing  
25 the group-level variance parameter by the sum of the group-level parameter and 3.29, an estimate  
26 of the theoretical variance in the binomial distribution<sup>20</sup>. In the results, these figures are

1  
2  
3 expressed as a percentage of the total variance at each level. Cases with missing outcome data  
4  
5 were excluded on a pairwise basis.  
6

## 7 8 RESULTS

9  
10 Descriptive statistics for group and sample sizes for each analysis are included in Table 1,  
11  
12 along with relative variance estimates. There were a total of 404,675 admissions for traumatic  
13  
14 injury during the time period included in this study. The three largest subgroups based on  
15  
16 mechanism were falls (N = 117,931), motor vehicle traffic (N = 22,755), and firearms (N =  
17  
18 6,512). All patients were included in analyses of mortality. Sample sizes for analyses of length of  
19  
20 stay were somewhat smaller, likely reflecting patients who were transported to a hospital but  
21  
22 died before admission (1.8% of the full sample was lost at this stage). Total charge data were  
23  
24 available for only a subset of patients, due to under-reporting of this variable by hospitals (31.4%  
25  
26 of the total sample was lost at this stage).  
27  
28  
29

30  
31 There was significant variance at the hospital level across outcomes and trauma  
32  
33 mechanism, although the extent of this variance ranged from 2.9% for mortality due to falls to  
34  
35 37.7% for total cost across all injury mechanisms. Neighborhood variance was minimal across  
36  
37 outcomes and mechanism as well, with the highest estimate being 1.1% for motor vehicle traffic  
38  
39 mortality.  
40  
41

## 42 DISCUSSION

43  
44 The persistence of disparities in health outcomes is an important concern for public  
45  
46 policy makers and for hospital administrators. This analysis addresses two important issues.  
47  
48 First, the extent of disparity in outcomes from trauma treatment has received relatively little  
49  
50 attention, with most research focusing primarily on treatment of acute and chronic disease.  
51  
52  
53 Second, a longstanding question has been the relative importance of placement of care facilities  
54  
55  
56  
57  
58  
59  
60

1  
2  
3 versus neighborhood risk factors and individual differences in creating patterns of geographic  
4 health inequality – i.e., do marginalized neighborhoods suffer because they have access to  
5 hospitals that have worse outcomes; because they exhibit environmental risk factors like  
6 exposure to greater violence, more toxic substances, and generally unsanitary and stressful  
7 conditions; or because their populations have other underlying risk factors, like higher rates of  
8 chronic disease and lower levels of insurance coverage, unrelated to specific neighborhood  
9 conditions.  
10  
11  
12  
13  
14  
15  
16  
17  
18

19 With respect to the first question, these results suggest that there are substantial  
20 disparities in trauma outcomes related to factors outside of the facts of the trauma case and  
21 individual differences in trauma patients. Ideally, these individual factors (represented here as  
22 part of the residual variance) should account for all of the variance in outcomes – patient  
23 outcomes should be equal across hospitals and across neighborhoods. Regarding the second  
24 question, these data indicate that identifiable inequalities account for between 3% and 36% of  
25 outcomes, depending on the outcome and trauma type examined. They also suggest that most of  
26 these disparities in trauma outcomes appear to be due to hospital-level disparities, with the  
27 independent influence of neighborhood being comparatively trivial. This lends support to the  
28 view that geographic disparities in trauma outcomes (at least within the specific context of the  
29 Detroit metropolitan area) seem to be mainly due to differences in care provided by facilities  
30 available in these areas.  
31  
32  
33  
34  
35  
36  
37  
38  
39  
40  
41  
42  
43  
44  
45  
46

47 This suggests that, at least in the case of trauma outcomes, policy should focus on  
48 reducing disparities in treatment quality between hospitals in order to reduce community-level  
49 disparities in outcomes. More broadly, it suggests that factors influencing geographic disparities  
50 in trauma outcomes may arise at the point of treatment, rather than being the result of different  
51  
52  
53  
54  
55  
56  
57  
58  
59  
60

1  
2  
3 levels of risk derived from the neighborhood environment, at least when considered within a  
4 single metropolitan area. Disparities in treatment quality may have a number of causes, including  
5 differences in investment, differences in resource allocation, and differences in institutional  
6 experience with treating trauma. In addition to addressing funding and investment disparities,  
7 ways of addressing these differences might include transferring high risk cases to hospitals with  
8 more extensive institutional experience in the relevant field.  
9

10  
11  
12  
13  
14  
15  
16  
17  
18  
19  
20  
21  
22  
23  
24  
25  
26  
27  
28  
29  
30  
31  
32  
33  
34  
35  
36  
37  
38  
39  
40  
41  
42  
43  
44  
45  
46  
47  
48  
49  
50  
51  
52  
53  
54  
55  
56  
57  
58  
59  
60  
Limitations of this study include the inherent inability to differentiate hospital-level variance that may be caused by differences in the patient population served at different institutions. For example, some institutions may admit a larger volume of more serious traumas, which may have less favorable outcomes. Additionally, because the database used includes only patients who were admitted, it is not possible to assess geographical differences in mortality among those who had a traumatic injury but died before they could be admitted for treatment. It is plausible that neighborhood disparities would be larger if these cases were included.

As policy-makers look for ways to reduce both disparities in trauma outcomes and the cost of providing care for traumatic injury, it is important to have a clear picture of the extent to which they differ as a function of local geography. This study represents a step towards addressing that question, indicating that differences between hospitals may play an important role in determining the extent of these differences.

1  
2  
3 CONFLICT OF INTEREST STATEMENT:  
4

5 The authors have no conflicting interests to declare.  
6

7  
8 AUTHOR CONTRIBUTIONS  
9

10 LS, RH, and MF drafted the manuscript. RH conducted the statistical analyses. LS and EE  
11  
12 developed the research questions. All authors reviewed and revised the manuscript.  
13

14  
15 DATA STATEMENT  
16

17 Data from the State Inpatient Database (SID for the state of Michigan for the years 2006 – 2014  
18  
19 were obtained from the Agency for Health Research and Quality's (AHRQ) Healthcare Cost and  
20  
21 Utilization Project (HCUP). These data are available for purchase from AHRQ at  
22  
23 <http://www.hcup-us.ahrq.gov/>  
24  
25

26  
27 FUNDING  
28

29 This research received no specific grant from any funding agency in the public, commercial or  
30  
31 not-for-profit sectors.  
32  
33  
34  
35  
36  
37  
38  
39  
40  
41  
42  
43  
44  
45  
46  
47  
48  
49  
50  
51  
52  
53  
54  
55  
56  
57  
58  
59  
60

## References

1. Adler, N. E. & Rehkopf, D. H. U.S. Disparities in Health: Descriptions, Causes, and Mechanisms. *Annu. Rev. Public Health* **29**, 235–252 (2008).
2. Howell, E. A., Hebert, P., Chatterjee, S., Kleinman, L. C. & Chassin, M. R. Black/white differences in very low birth weight neonatal mortality rates among New York City hospitals. *Pediatrics* **121**, e407–e415 (2008).
3. Freedman, V. A., Martin, L. G. & Schoeni, R. F. Recent trends in disability and functioning among older adults in the united states: A systematic review. *J. Am. Med. Assoc.* **288**, 3137–3146 (2002).
4. Juarez, P. D. *et al.* The public health exposome: a population-based, exposure science approach to health disparities research. *Int. J. Environ. Res. Public. Health* **11**, 12866–12895 (2014).
5. Jackson, J. S., Knight, K. M. & Rafferty, J. A. Race and Unhealthy Behaviors: Chronic Stress, the HPA Axis, and Physical and Mental Health Disparities Over the Life Course. *Am. J. Public Health* **100**, 933–939 (2010).
6. Dimick, J., Ruhter, J., Sarrazin, M. V. & Birkmeyer, J. D. Black patients more likely than whites to undergo surgery at low-quality hospitals in segregated regions. *Health Aff. (Millwood)* **32**, 1046–1053 (2013).
7. Haider, A. H. *et al.* Disparities in trauma care and outcomes in the United States: A systematic review and meta-analysis. *J. Trauma Acute Care Surg.* **74**, 1195–1205 (2013).
8. Maybury, R. S. *et al.* Pedestrians struck by motor vehicles further worsen race- and insurance-based disparities in trauma outcomes: The case for inner-city pedestrian injury prevention programs. *Surgery* **148**, 202–208 (2010).

- 1  
2  
3 9. Reimers, A. & Laflamme, L. Hip Fractures Among the Elderly: Personal and Contextual  
4  
5 Social Factors That Matter. *J. Trauma Acute Care Surg.* **62**, 365–369 (2007).  
6
- 7  
8 10. Corrigan, J. D. & Bogner, J. A. Neighborhood Characteristics and Outcomes After  
9  
10 Traumatic Brain Injury. *Arch. Phys. Med. Rehabil.* **89**, 912–921 (2008).  
11
- 12  
13 11. Iceland, J. & Sharp, G. White Residential Segregation in U.S. Metropolitan Areas:  
14  
15 Conceptual Issues, Patterns, and Trends from the U.S. Census, 1980 to 2010. *Popul. Res.*  
16  
17 *Policy Rev.* **32**, 663–686 (2013).  
18
- 19  
20 12. Bergeron, E., Lavoie, A., Moore, L., Clas, D. & Rossignol, M. Comorbidity and age are  
21  
22 both independent predictors of length of hospitalization in trauma patients. *Can. J. Surg.* **48**,  
23  
24 361 (2005).  
25
- 26  
27 13. Moore, L. *et al.* Using information on preexisting conditions to predict mortality from  
28  
29 traumatic injury. *Ann. Emerg. Med.* **52**, 356–364.e2 (2008).  
30
- 31  
32 14. Tsai, T. C., Orav, E. J. & Jha, A. K. Patient Satisfaction and Quality of Surgical Care in  
33  
34 US Hospitals. *Ann. Surg.* **261**, 2–8 (2015).  
35
- 36  
37 15. Hasnain-Wynia R, Baker DW, Nerenz D & et al. Disparities in health care are driven by  
38  
39 where minority patients seek care: Examination of the hospital quality alliance measures.  
40  
41 *Arch. Intern. Med.* **167**, 1233–1239 (2007).  
42
- 43  
44 16. Vettukattil, A. S. *et al.* Do Trauma Safety-Net Hospitals Deliver Truly Safe Trauma  
45  
46 Care? A Multilevel Analysis of the National Trauma Data Bank. *J. Trauma Acute Care Surg.*  
47  
48 **70**, 978–984 (2011).  
49
- 50  
51 17. Darden, J., Rahbar, M., Jezierski, L., Li, M. & Velie, E. The Measurement of  
52  
53 Neighborhood Socioeconomic Characteristics and Black and White Residential Segregation in  
54  
55  
56  
57  
58  
59  
60

1  
2  
3 Metropolitan Detroit: Implications for the Study of Social Disparities in Health. *Ann. Assoc.*  
4  
5 *Am. Geogr.* **100**, 137–158 (2010).  
6

7  
8 18. Healthcare Cost and Utilization Project (HCUP). *HCUP State Inpatient Databases (SID)*.  
9  
10 (Agency for Healthcare Research and Quality, 2006).  
11

12 19. Brown, H. & Prescott, R. *Applied mixed models in medicine*. (John Wiley & Sons, 2014).  
13

14 20. Nakagawa, S., Johnson, P. C. D. & Schielzeth, H. The coefficient of determination R<sup>2</sup>  
15 and intra-class correlation coefficient from generalized linear mixed-effects models revisited  
16 and expanded. *J. R. Soc. Interface* **14**, (2017).  
17  
18  
19  
20  
21  
22  
23  
24  
25  
26  
27  
28  
29  
30  
31  
32  
33  
34  
35  
36  
37  
38  
39  
40  
41  
42  
43  
44  
45  
46  
47  
48  
49  
50  
51  
52  
53  
54  
55  
56  
57  
58  
59  
60



Table 1. Variance decomposition statistics

|                      | Hospital<br>Variance | Neighborhood<br>Variance | Residual<br>Variance | Patient<br>N | Hospital<br>N | ZIP<br>code<br>N | Mean<br>(SD) or<br>% |
|----------------------|----------------------|--------------------------|----------------------|--------------|---------------|------------------|----------------------|
| <b>All Injuries</b>  |                      |                          |                      |              |               |                  |                      |
| Mortality            | 15.4%                | 0.8%                     | 83.8%                | 404,675      | 143           | 214              | 2.5%                 |
| Length of Stay       | 36.2%                | 0.2%                     | 63.6%                | 397,564      | 143           | 214              | 6.4 (8.3)            |
| Total Cost           | 37.7%                | 0.2%                     | 62.2%                | 277,668      | 143           | 214              | 36,264<br>(55,237)   |
| <b>Falls</b>         |                      |                          |                      |              |               |                  |                      |
| Mortality            | 2.9%                 | 0.2%                     | 96.9%                | 117,931      | 123           | 213              | 2.2%                 |
| Length of Stay       | 20.5%                | 0.5%                     | 79.3%                | 115,798      | 123           | 213              | 5.2 (5.1)            |
| Total Cost           | 25.0%                | 0.1%                     | 74.9%                | 78,539       | 109           | 213              | 29,641<br>(31,826)   |
| <b>Firearms</b>      |                      |                          |                      |              |               |                  |                      |
| Mortality            | 20.1%                | 0.8%                     | 79.1%                | 6,512        | 60            | 179              | 5.4%                 |
| Length of Stay       | 11.5%                | 0.3%                     | 88.2%                | 6,101        | 60            | 179              | 7.0<br>(10.6)        |
| Total Cost           | 18.4%                | 0.03%                    | 81.5%                | 3,163        | 60            | 179              | 62,215<br>(91,234)   |
| <b>Motor Vehicle</b> |                      |                          |                      |              |               |                  |                      |
| Mortality            | 4.7%                 | 1.1%                     | 94.2%                | 22,755       | 100           | 211              | 2.3%                 |
| Length of Stay       | 13.1%                | 0.3%                     | 86.6%                | 21,598       | 100           | 211              | 5.2 (7.9)            |

---

|    |            |       |      |       |        |     |     |          |
|----|------------|-------|------|-------|--------|-----|-----|----------|
| 1  |            |       |      |       |        |     |     |          |
| 2  |            |       |      |       |        |     |     |          |
| 3  |            |       |      |       |        |     |     |          |
| 4  | Total Cost | 21.6% | 0.6% | 77.8% | 12,833 | 100 | 211 | 49,358   |
| 5  |            |       |      |       |        |     |     |          |
| 6  |            |       |      |       |        |     |     | (75,765) |
| 7  |            |       |      |       |        |     |     |          |
| 8  |            |       |      |       |        |     |     |          |
| 9  |            |       |      |       |        |     |     |          |
| 10 |            |       |      |       |        |     |     |          |
| 11 |            |       |      |       |        |     |     |          |
| 12 |            |       |      |       |        |     |     |          |
| 13 |            |       |      |       |        |     |     |          |
| 14 |            |       |      |       |        |     |     |          |
| 15 |            |       |      |       |        |     |     |          |
| 16 |            |       |      |       |        |     |     |          |
| 17 |            |       |      |       |        |     |     |          |
| 18 |            |       |      |       |        |     |     |          |
| 19 |            |       |      |       |        |     |     |          |
| 20 |            |       |      |       |        |     |     |          |
| 21 |            |       |      |       |        |     |     |          |
| 22 |            |       |      |       |        |     |     |          |
| 23 |            |       |      |       |        |     |     |          |
| 24 |            |       |      |       |        |     |     |          |
| 25 |            |       |      |       |        |     |     |          |
| 26 |            |       |      |       |        |     |     |          |
| 27 |            |       |      |       |        |     |     |          |
| 28 |            |       |      |       |        |     |     |          |
| 29 |            |       |      |       |        |     |     |          |
| 30 |            |       |      |       |        |     |     |          |
| 31 |            |       |      |       |        |     |     |          |
| 32 |            |       |      |       |        |     |     |          |
| 33 |            |       |      |       |        |     |     |          |
| 34 |            |       |      |       |        |     |     |          |
| 35 |            |       |      |       |        |     |     |          |
| 36 |            |       |      |       |        |     |     |          |
| 37 |            |       |      |       |        |     |     |          |
| 38 |            |       |      |       |        |     |     |          |
| 39 |            |       |      |       |        |     |     |          |
| 40 |            |       |      |       |        |     |     |          |
| 41 |            |       |      |       |        |     |     |          |
| 42 |            |       |      |       |        |     |     |          |
| 43 |            |       |      |       |        |     |     |          |
| 44 |            |       |      |       |        |     |     |          |
| 45 |            |       |      |       |        |     |     |          |
| 46 |            |       |      |       |        |     |     |          |
| 47 |            |       |      |       |        |     |     |          |
| 48 |            |       |      |       |        |     |     |          |
| 49 |            |       |      |       |        |     |     |          |
| 50 |            |       |      |       |        |     |     |          |
| 51 |            |       |      |       |        |     |     |          |
| 52 |            |       |      |       |        |     |     |          |
| 53 |            |       |      |       |        |     |     |          |
| 54 |            |       |      |       |        |     |     |          |
| 55 |            |       |      |       |        |     |     |          |
| 56 |            |       |      |       |        |     |     |          |
| 57 |            |       |      |       |        |     |     |          |
| 58 |            |       |      |       |        |     |     |          |
| 59 |            |       |      |       |        |     |     |          |
| 60 |            |       |      |       |        |     |     |          |

---

For peer review only

## STROBE Statement—checklist of items that should be included in reports of observational studies

|                              | <b>Item No</b> | <b>Recommendation</b>                                                                                                                                                                                                                                                                                                                                                                            |
|------------------------------|----------------|--------------------------------------------------------------------------------------------------------------------------------------------------------------------------------------------------------------------------------------------------------------------------------------------------------------------------------------------------------------------------------------------------|
| <b>Title and abstract</b>    | 1              | (a) Indicate the study's design with a commonly used term in the title or the abstract<br><b>Page 1</b><br>(b) Provide in the abstract an informative and balanced summary of what was done and what was found<br><b>Page 2</b>                                                                                                                                                                  |
| <b>Introduction</b>          |                |                                                                                                                                                                                                                                                                                                                                                                                                  |
| Background/rationale         | 2              | Explain the scientific background and rationale for the investigation being reported<br><b>Pages 1 – 5</b>                                                                                                                                                                                                                                                                                       |
| Objectives                   | 3              | State specific objectives, including any prespecified hypotheses<br><b>Page 5</b>                                                                                                                                                                                                                                                                                                                |
| <b>Methods</b>               |                |                                                                                                                                                                                                                                                                                                                                                                                                  |
| Study design                 | 4              | Present key elements of study design early in the paper<br><b>Pages 5 – 7</b>                                                                                                                                                                                                                                                                                                                    |
| Setting                      | 5              | Describe the setting, locations, and relevant dates, including periods of recruitment, exposure, follow-up, and data collection<br><b>Pages 5 – 6</b>                                                                                                                                                                                                                                            |
| Participants                 | 6              | (a) <i>Cross-sectional study</i> —Give the eligibility criteria, and the sources and methods of selection of participants<br><b>Pages 5 – 6</b>                                                                                                                                                                                                                                                  |
| Variables                    | 7              | Clearly define all outcomes, exposures, predictors, potential confounders, and effect modifiers. Give diagnostic criteria, if applicable<br><b>Page 6</b>                                                                                                                                                                                                                                        |
| Data sources/<br>measurement | 8*             | For each variable of interest, give sources of data and details of methods of assessment (measurement). Describe comparability of assessment methods if there is more than one group<br><b>Pages 5 – 6</b>                                                                                                                                                                                       |
| Bias                         | 9              | Describe any efforts to address potential sources of bias<br><b>Page 7</b>                                                                                                                                                                                                                                                                                                                       |
| Study size                   | 10             | Explain how the study size was arrived at<br><b>Page 8</b>                                                                                                                                                                                                                                                                                                                                       |
| Quantitative variables       | 11             | Explain how quantitative variables were handled in the analyses. If applicable, describe which groupings were chosen and why<br><b>Pages 6 – 7</b>                                                                                                                                                                                                                                               |
| Statistical methods          | 12             | (a) Describe all statistical methods, including those used to control for confounding<br><b>Page 7</b><br>(b) Describe any methods used to examine subgroups and interactions<br><b>Page 7</b><br>(c) Explain how missing data were addressed<br><b>Page 7</b><br>(d) <i>Cross-sectional study</i> —If applicable, describe analytical methods taking account of sampling strategy<br><b>N/A</b> |

(e) Describe any sensitivity analyses

N/A

Continued on next page

**Results**

|                          |     |                                                                                                                                                                                                                                                                                                                                                                                                                                                         |
|--------------------------|-----|---------------------------------------------------------------------------------------------------------------------------------------------------------------------------------------------------------------------------------------------------------------------------------------------------------------------------------------------------------------------------------------------------------------------------------------------------------|
| Participants             | 13* | (a) Report numbers of individuals at each stage of study—eg numbers potentially eligible, examined for eligibility, confirmed eligible, included in the study, completing follow-up, and analysed<br><b>Page 8</b><br>(b) Give reasons for non-participation at each stage<br><b>N/A</b><br>(c) Consider use of a flow diagram<br><b>N/A</b>                                                                                                            |
| Descriptive data         | 14* | (a) Give characteristics of study participants (eg demographic, clinical, social) and information on exposures and potential confounders<br><b>Page 8</b><br>(b) Indicate number of participants with missing data for each variable of interest<br><b>Table 1</b>                                                                                                                                                                                      |
| Outcome data             | 15* | <i>Cross-sectional study</i> —Report numbers of outcome events or summary measures<br><b>Table 1</b>                                                                                                                                                                                                                                                                                                                                                    |
| Main results             | 16  | (a) Give unadjusted estimates and, if applicable, confounder-adjusted estimates and their precision (eg, 95% confidence interval). Make clear which confounders were adjusted for and why they were included<br><b>N/A</b><br>(b) Report category boundaries when continuous variables were categorized<br><b>N/A</b><br>(c) If relevant, consider translating estimates of relative risk into absolute risk for a meaningful time period<br><b>N/A</b> |
| Other analyses           | 17  | Report other analyses done—eg analyses of subgroups and interactions, and sensitivity analyses<br><b>Page 8 &amp; Table 1</b>                                                                                                                                                                                                                                                                                                                           |
| <b>Discussion</b>        |     |                                                                                                                                                                                                                                                                                                                                                                                                                                                         |
| Key results              | 18  | Summarise key results with reference to study objectives<br><b>Page 9</b>                                                                                                                                                                                                                                                                                                                                                                               |
| Limitations              | 19  | Discuss limitations of the study, taking into account sources of potential bias or imprecision. Discuss both direction and magnitude of any potential bias<br><b>Page 10</b>                                                                                                                                                                                                                                                                            |
| Interpretation           | 20  | Give a cautious overall interpretation of results considering objectives, limitations, multiplicity of analyses, results from similar studies, and other relevant evidence<br><b>Pages 9 – 10</b>                                                                                                                                                                                                                                                       |
| Generalisability         | 21  | Discuss the generalisability (external validity) of the study results<br><b>Page 9</b>                                                                                                                                                                                                                                                                                                                                                                  |
| <b>Other information</b> |     |                                                                                                                                                                                                                                                                                                                                                                                                                                                         |
| Funding                  | 22  | Give the source of funding and the role of the funders for the present study and, if applicable,                                                                                                                                                                                                                                                                                                                                                        |

1  
2 for the original study on which the present article is based

3 N/A

4  
5 \*Give information separately for cases and controls in case-control studies and, if applicable, for exposed and  
6 unexposed groups in cohort and cross-sectional studies.  
7

8  
9 **Note:** An Explanation and Elaboration article discusses each checklist item and gives methodological background and  
10 published examples of transparent reporting. The STROBE checklist is best used in conjunction with this article (freely  
11 available on the Web sites of PLoS Medicine at <http://www.plosmedicine.org/>, Annals of Internal Medicine at  
12 <http://www.annals.org/>, and Epidemiology at <http://www.epidem.com/>). Information on the STROBE Initiative is  
13 available at [www.strobe-statement.org](http://www.strobe-statement.org).  
14  
15  
16  
17  
18  
19  
20  
21  
22  
23  
24  
25  
26  
27  
28  
29  
30  
31  
32  
33  
34  
35  
36  
37  
38  
39  
40  
41  
42  
43  
44  
45  
46  
47  
48  
49  
50  
51  
52  
53  
54  
55  
56  
57  
58  
59  
60

# BMJ Open

## Between-hospital and between-neighborhood variance in trauma outcomes: Cross-sectional observational evidence from the Detroit metropolitan area

|                                 |                                                                                                                                                                                                                                                           |
|---------------------------------|-----------------------------------------------------------------------------------------------------------------------------------------------------------------------------------------------------------------------------------------------------------|
| Journal:                        | <i>BMJ Open</i>                                                                                                                                                                                                                                           |
| Manuscript ID                   | bmjopen-2018-022090.R1                                                                                                                                                                                                                                    |
| Article Type:                   | Research                                                                                                                                                                                                                                                  |
| Date Submitted by the Author:   | 15-Jun-2018                                                                                                                                                                                                                                               |
| Complete List of Authors:       | Sall, Lauren; St. John Hospital & Medical Center, Surgery<br>Hayward, R. David; St. John Hospital & Medical Center, Surgery<br>Fessler, Mary; St. John Hospital & Medical Center, Surgery<br>Edhayan, Elango; St. John Hospital & Medical Center, Surgery |
| <b>Primary Subject Heading</b>: | Emergency medicine                                                                                                                                                                                                                                        |
| Secondary Subject Heading:      | Public health, Surgery                                                                                                                                                                                                                                    |
| Keywords:                       | ACCIDENT & EMERGENCY MEDICINE, Quality in health care < HEALTH SERVICES ADMINISTRATION & MANAGEMENT, PUBLIC HEALTH, TRAUMA MANAGEMENT                                                                                                                     |
|                                 |                                                                                                                                                                                                                                                           |

SCHOLARONE™  
Manuscripts

1  
2  
3 Between-hospital and between-neighborhood variance in trauma outcomes: Cross-sectional  
4  
5 observational evidence from the Detroit metropolitan area  
6  
7  
8  
9  
10  
11

12 Lauren Sall, MD

13  
14 R. David Hayward, PhD\*

15  
16 Mary M. Fessler, BA

17  
18 Elango Edhayan, MD, FACS  
19  
20  
21  
22

23  
24 St. John Hospital & Medical Center

25  
26 Department of Surgery

27  
28 Detroit, MI

29  
30 USA  
31  
32  
33  
34  
35  
36  
37

38 WORD COUNT: 2,912

39  
40 KEY WORDS: traumatic injury; health inequalities; neighborhoods; trauma outcomes  
41

42 Direct Correspondence to:

43 R. David Hayward, PhD

44 Senior Medical Researcher

45 Department of Surgery

46 St. John Hospital & Medical Center

47 22151 Moross Rd., PB 1, Suite. 212

48 Detroit, MI 48236

49 USA

50 Phone: (313) 343-3485

51 Email: Richard.Hayward@ascension.org  
52  
53  
54  
55  
56  
57  
58  
59  
60

## ABSTRACT

**OBJECTIVES:** Disparities in treatment outcomes for traumatic injury are an important concern for care providers and policy makers. Factors that may influence these disparities include differences in risk exposure based on neighborhood of residence, and differences in quality of care between hospitals in different areas. This study examines geographic disparities within a single region: the Detroit metropolitan area.

**DESIGN:** Data on all trauma admissions between 2006 and 2014 were obtained from the Michigan State Inpatient Database. Admissions were grouped by patient neighborhood of residence and admitting hospital. Generalized Linear Mixed Modeling procedures were used to determine the extent of shared variance based on these two levels of categorization on three outcomes. Patients with trauma due to common mechanisms (falls, firearms, and motor vehicle traffic) were examined as additional subgroups.

**SETTING:** 143 hospitals admitting patients for traumatic injury in the Detroit metropolitan area during the period from 2006 – 2014.

**PARTICIPANTS:** 404,675 adult patients admitted for treatment of traumatic injury.

**OUTCOME MEASURES:** In-hospital mortality, length of stay, and hospital charges.

**RESULTS:** Intraclass correlation coefficients indicated that there was substantial shared variance in outcomes based on hospital, but not based on neighborhood of residence. Among all injury types, hospital-level differences accounted for 15.4% of variance in mortality risk, 36.2% of variance in length of stay, and 37.7% of variance in hospital charges. Hospital variance in mortality was highest for firearm trauma (20.1%).

**CONCLUSIONS:** Based on these data, geographic disparities in trauma treatment outcomes were more strongly attributable to differences in access to quality hospital care than to risk



1  
2  
3 factors in the neighborhood environment. Transfer of high-risk cases, particularly firearm-related  
4  
5 trauma, to hospitals with greater institutional experience in the relevant area may help address  
6  
7 mortality disparities in particular.  
8  
9

## 10 11 12 STRENGTHS AND LIMITATIONS OF THIS STUDY 13

- 14 • Data covers all hospital admissions in a major metropolitan area over a 9-year period
  - 15 • Multi-level analysis allows decomposition of differences in patient outcomes shared  
16 within neighborhood of residence and hospital of treatment
  - 17 • Range of outcomes including mortality, length of stay, and hospital charges
  - 18 • Cannot assess mortality occurring before hospital admission
  - 19 • Differences in intake patterns may increase between-hospital variance
- 20  
21  
22  
23  
24  
25  
26  
27  
28  
29  
30  
31  
32  
33  
34  
35  
36  
37  
38  
39  
40  
41  
42  
43  
44  
45  
46  
47  
48  
49  
50  
51  
52  
53  
54  
55  
56  
57  
58  
59  
60

## INTRODUCTION

The persistence of disparities in patient outcomes is a serious challenge for the US health care system<sup>1</sup>. People with low incomes and members of racial and ethnic minority groups experience worse health outcomes across a broad spectrum, from lower birth weight<sup>2</sup> to greater risk of functional disability in older adulthood<sup>3</sup>. The causes of these disparities are complex and multifaceted, including differing levels of environmental exposure to health hazards<sup>4</sup>, cultural differences in health behaviors<sup>5</sup>, and unequal access to quality care<sup>6</sup>. Within the field of health disparities research, traumatic injury has received relatively little attention in comparison to areas such as chronic disease and infection<sup>7</sup>. Nevertheless, there is a significant body of evidence finding that factors including race<sup>7,8</sup> and socioeconomic status<sup>9,10</sup> may affect patients' risk of negative outcomes following trauma treatment.

The local geography of cities may play an important role in forming these disparities. Cities in the US remain heavily segregated by both race and socioeconomic status, with sharp differences in the demographic makeup of neighborhoods that may be in close proximity to one another<sup>11</sup>. These neighborhoods may differ in terms of the risks they pose for traumatic injury. For example, socioeconomically-disadvantaged neighborhoods may have higher rates of trauma from causes like assault, which may entail greater risks of poorer outcomes. More broadly, residents of marginalized neighborhoods may face greater background health challenges, leaving them more likely to suffer from multiple comorbidities that are likely to complicate recovery from traumatic injury<sup>12,13</sup>.

A related facet of metropolitan geography potentially impacting trauma outcomes relates to hospital quality and access. Quality of care issues are an increasing concern in the realm of public policy<sup>14</sup>. Large cities contain numerous hospitals providing emergency trauma care, and

1  
2  
3 most trauma patients are likely to be receive treatment at facilities in close proximity to the  
4 places in which they live. Hospitals and other health care facilities serving primarily poor and  
5 marginalized local populations may face challenges with funding levels and patient demands that  
6 inhibit care quality<sup>6,15</sup>. Insurance issues and patient familiarity may also serve to funnel high-risk  
7 patients towards under-resourced hospitals, as patients may be more likely to opt to seek care at  
8 institutions with which they are more familiar, and which they may perceive as less costly<sup>16</sup>.  
9

10  
11  
12  
13  
14  
15  
16  
17 The extent to which these two aspects of local geography within metropolitan areas—  
18 residential neighborhood and care facility – may be related to trauma outcomes has not been  
19 thoroughly assessed. In this study, we use data from all trauma patients admitted for traumatic  
20 injury to hospitals in the Detroit metropolitan area between 2006 and 2014 and apply statistical  
21 techniques to determine the extent to which three outcomes (mortality, length of hospital stay,  
22 and hospital charges) differ as a function of (a) the neighborhoods in which patients reside, and  
23 (b) the hospital providing care. The Detroit metropolitan area has some of the highest levels of  
24 residential racial and ethnic segregation in the US, as well as some of the most extreme  
25 economic inequalities<sup>17</sup>. As a region that has experienced a historical pattern of economic decline  
26 and rejuvenation, as well as successive waves of movement between urban and suburban  
27 neighborhoods, it serves to exemplify a number of the socioeconomic challenges facing policy  
28 makers and health care providers in numerous US cities. It has a well-developed emergency and  
29 trauma infrastructure, including three hospitals with ACS Level I trauma designation and 13 with  
30 Level II designation during the period covered by this study.  
31  
32  
33  
34  
35  
36  
37  
38  
39  
40  
41  
42  
43  
44  
45  
46  
47  
48

## 49 METHOD

50  
51 Individual-level admissions data for this project were obtained from the Healthcare Cost  
52 and Utilization Project (HCUP), sponsored by the Agency for Health Research and Quality  
53  
54  
55  
56  
57  
58  
59

1  
2  
3 (AHRQ). One element of the HCUP is the compilation of an annual database including medical  
4 details of all hospital discharges in each state, known as the State Inpatient Database (SID).

5  
6  
7 Ethical approval for use of the data was granted by the Institutional Review Board of St. John  
8 Hospital and Medical Center. Because the data were derived from clinical patient records and  
9  
10 were fully anonymous and de-identified, participant consent was not required.  
11  
12  
13

14  
15 Data for the present analyses come from the Michigan SID for the period of years from  
16 2006 to 2014<sup>18</sup>. Patients residing in the Detroit Metropolitan Statistical Area (MSA) were  
17 identified using the US Census Bureau definition as consisting of Wayne, Lapeer, Livingston,  
18 Macomb, Oakland, and St. Clair counties. Trauma cases were identified using ICD-9 diagnostic  
19 codes present at admission (ICD-9 codes 800 – 959 were included).  
20  
21  
22  
23  
24  
25

26 Hospitals. Each record in the SID includes a unique, anonymized, identification code  
27 corresponding to the hospital to which the patient was admitted. This allows patients to be  
28 clustered according to hospital. After excluding institutions with fewer than 100 trauma  
29 admissions during the 9-year study period, there were a total of 66 hospitals represented in the  
30 data, with a median of 2,845 observations in each cluster.  
31  
32  
33  
34  
35  
36

37 Neighborhoods. Patient residence was identified by ZIP code in the SID, and in this study  
38 each ZIP code is treated as a separate neighborhood. There were a total of 214 neighborhoods  
39 represented in the data, with a median of 1,633 observations in each.  
40  
41  
42  
43

44 Patient outcomes. Patient outcomes include in-hospital mortality, length of stay, and total  
45 hospital charges. Mortality was derived from the case disposition code (0 = did not die, 1 =  
46 died). Length of stay is given by the number of days between admission and discharge. Total  
47 hospital charges is a dollar amount corresponding to the total amount billed to any payer for each  
48 admission.  
49  
50  
51  
52  
53  
54  
55  
56  
57  
58  
59  
60

1  
2  
3 Trauma mechanism. Trauma mechanisms are derived from ICD-9 diagnosis codes  
4 included for each admission case in the SID. The three most common specific mechanisms in  
5 this sample were examined in these analyses: falls, firearms, and motor vehicle traffic.  
6  
7

8  
9  
10 Injury severity. ICD-9 diagnosis codes included in the SID were used to calculate  
11 estimated injury severity scores (ISS) for all patients. This procedure was carried out using  
12 ICDPIC-R<sup>19</sup>, an open-source program executed in the R statistical environment which computes  
13 abbreviated injury score (AIS) by body region based on ICD-9 codes, and then calculates an  
14 estimated ISS based on regional AIS, and is based on a set of procedures that have been  
15 extensively validated for this purpose<sup>20,21</sup>.  
16  
17  
18  
19  
20  
21  
22

23 Patient and neighborhood demographics. Individual demographics included age (in  
24 years), gender, and race (white, black, or other). Neighborhood socioeconomic status (SES) was  
25 measured using ZIP code-level poverty rate estimates published by the US Census Bureau<sup>22</sup>.  
26 These estimates represent a three-year rolling average (e.g., the estimates for 2014 represent data  
27 from 2012 – 2014). Because poverty rate data were not made available until 2012, whereas this  
28 study covers the period from 2006 – 2014, neighborhood SES is represented in this study as a  
29 single rate regardless of year (rather than varying across time), using data from 2014. It was not  
30 possible to include information about hospital characteristics (e.g., trauma level designation)  
31 because the Michigan SID excludes identifiers that would enable cross-referencing hospital IDs  
32 with American Hospital Association data.  
33  
34  
35  
36  
37  
38  
39  
40  
41  
42  
43  
44  
45

#### 46 Analytical approach

47  
48  
49 In this study, we use a generalized linear mixed modeling (GLMM) framework to  
50 estimate the proportion of variance in individual outcomes that is attributable to each of three  
51 levels: hospitals, neighborhoods, and individuals (i.e., residual variance after hospital and  
52  
53  
54  
55  
56  
57  
58  
59  
60

neighborhood variance has been accounted for). The GLMM method<sup>23</sup> is a statistical modeling technique which includes a mixture of fixed and random effects. Random effects represent shared group-level linear relationships. Individual outcome values are allowed to vary at random around a group mean, allowing for an estimate of the part of the outcome that varies between groups and that varying between individuals. In these analyses, random intercept effects are specified for both hospital and neighborhood, meaning that individual outcomes are allowed to vary at random around both a hospital mean and a neighborhood mean. The group-level design matrix is specified as cross-classified, meaning that both sets of higher-level clusters are included in the same model, with each individual belonging to both a hospital and neighborhood cluster. Because the distributions of the outcome variables are not the same, different linking functions are used in GLMM models with different outcomes. Mortality is a binary variable, and uses a binary linking function. Length of stay and total charges both have highly skewed continuous distributions, making the use of a longnormal linking function appropriate.

The proportion of variance at the group level is given by the intra-class correlation coefficient (ICC) corresponding to the level of clustering (in this case, hospital and neighborhood). For outcomes with a non-binary function (i.e., length of stay and charges), the ICC is computed by dividing the group-level variance parameter by the sum of the group and residual variance parameters. For binary GLMM (i.e., mortality), the ICC is given by dividing the group-level variance parameter by the sum of the group-level parameter and 3.29, an estimate of the theoretical variance in the binomial distribution<sup>24</sup>. In the results, these figures are expressed as a percentage of the total variance at each level. Cases with missing outcome data were excluded on a pairwise basis. LOS analyses exclude cases with mortality prior to admission (hence missing LOS data), but include other in-hospital mortality cases. Analyses were

conducted using SAS 9.4, except for the estimation of ISS, which was carried out using ICDPIC-R in R 3.5.

### Patient and Public Involvement

This study addresses patient priorities by seeking to better understand how trauma care systems may be able to reduce patient mortality rates, the length of hospitalization, and charges incurred. Data are derived from administrative records, so patients were not directly involved in the design, recruitment, or conduct of the study. Results will be accessible to the public, including to individuals who may have patients during the study period.

### RESULTS

Table 1 presents descriptive statistics for the full patient sample at the individual, hospital, and neighborhood levels. There were a total of 404,675 admissions for traumatic injury during the time period included in this study, representing a total of 66 hospitals and 214 ZIP codes. The mean number of patients per hospital was 2,845 (IQR: 349 – 9,683), and the mean number per neighborhood was 1,630 (IQR: 765 – 2,879). The three largest subgroups based on mechanism were falls (N = 117,931), motor vehicle traffic (N = 22,755), and firearms (N = 6,512).

Table 1. Descriptive statistics at the individual, hospital, and neighborhood levels

|             | Individual<br>(N = 404,675)<br>Mean (SD) or % | Hospital<br>(N = 66)<br>Median [IQR] | Neighborhood<br>(N = 214)<br>Median [IQR] |
|-------------|-----------------------------------------------|--------------------------------------|-------------------------------------------|
| N           |                                               | 2,845                                | 1,630                                     |
| individuals |                                               | [349; 9,683]                         | [765; 2,879]                              |
| Age         | 60.4 (23.7)                                   | 62.0                                 | 60.8                                      |
|             |                                               | [53.2, 66.6]                         | [57.3, 65.2]                              |
| Female      | 49.8%                                         | 50.6%                                | 50.5%                                     |
|             |                                               | [40.1%, 56.7%]                       | [46.3%, 54.2%]                            |
| Race        |                                               |                                      |                                           |
| White       | 70.0%                                         | 74.6%                                | 70.8%                                     |
|             |                                               | [40.6%, 91.0%]                       | [45.5%, 82.4%]                            |

|                                |             |                |                |
|--------------------------------|-------------|----------------|----------------|
| Black                          | 26.0%       | 7.6%           | 2.3%           |
|                                |             | [2.2%, 19.3%]  | [0.9%, 10.0%]  |
| Other                          | 4.0%        | 8.2%           | 17.2%          |
|                                |             | [3.6%, 23.2%]  | [12.0%, 30.7%] |
| Mechanism                      |             |                |                |
| Falls                          | 44.3%       | 43.7%          | 46.7%          |
|                                |             | [26.9%, 54.1%] | [40.4%, 52.2%] |
| Firearms                       | 2.4%        | 0.4%           | 0.6%           |
|                                |             | [0.04%, 1.1%]  | [0.2%, 1.4%]   |
| Motor Vehicle                  | 8.6%        | 5.4%           | 8.4%           |
|                                |             | [2.8%, 12.1%]  | [7.0%, 10.4%]  |
| Severity                       | 4.9 (5.4)   | 4.5            | 5.0            |
|                                |             | [3.5, 5.5]     | [4.7, 5.2]     |
| Mortality                      | 2.5%        | 2.2%           | 2.4%           |
|                                |             | [1.6%, 3.0%]   | [2.0%, 2.7%]   |
| LOS                            | 6.4 (8.3)   | 5.9            | 6.3            |
|                                |             | [5.2, 6.7]     | [5.9, 6.7]     |
| Charges (thousands of dollars) | 36.3 (55.2) | 32.5           | 36.9           |
|                                |             | [25.5, 41.2]   | [33.7, 39.5]   |
| Poverty Rate                   | 17.4 (14.4) | 14.5           | 10.7           |
|                                |             | [11.8, 19.9]   | [6.5, 18.7]    |

Tables 2 and 3 allow for comparisons of case characteristics by neighborhood SES (defined by poverty rate quartiles) and injury severity (defined by cases with ISS up to 15 and those with ISS greater than 15). Patients from the poorest neighborhoods were substantially younger than the patient population as a whole, and were more likely to be male and black. Mortality rates, LOS, and charges were all significantly higher in poorer neighborhoods, but the magnitude of these differences in outcomes was small (e.g., 2.4% mortality in the lowest-quartile poverty neighborhoods, compared with 2.6% in the highest-poverty quartile). Both outcomes and demographics differed substantially by injury severity. Severely injured patients were much more likely to be male, and were somewhat younger and somewhat more likely to be Black. Firearm and MVT mechanisms were also much more common among the more severe injuries.



As would be expected, mortality was substantially higher among those with more severe injuries, as were median LOS and charges.

Table 2. Individual descriptive statistics by poverty quartile

|                                              | 1 <sup>st</sup> Quartile<br>( $< 6.5\%$ )<br>N = 103,004 | 2 <sup>nd</sup> Quartile<br>( $6.5\% - 10.8\%$ )<br>N = 79,738 | 3 <sup>rd</sup> Quartile<br>( $10.8\% - 18.7\%$ )<br>N = 90,554 | 4 <sup>th</sup> Quartile<br>( $> 18.7\%$ )<br>N = 134,257 | <i>p</i> -value <sup>a</sup> |
|----------------------------------------------|----------------------------------------------------------|----------------------------------------------------------------|-----------------------------------------------------------------|-----------------------------------------------------------|------------------------------|
| Age, mean [95% CI]                           | 63.9 [63.7, 64.0]                                        | 65.1 [64.9, 65.2]                                              | 62.3 [62.1, 62.4]                                               | 53.8 [53.6, 53.9]                                         | $< .001$                     |
| Female                                       | 53.0%                                                    | 54.0%                                                          | 52.0%                                                           | 43.4%                                                     | $< .001$                     |
| Race                                         |                                                          |                                                                |                                                                 |                                                           | $< .001$                     |
| White                                        | 86.9%                                                    | 93.5%                                                          | 83.1%                                                           | 38.5%                                                     |                              |
| Black                                        | 9.5%                                                     | 3.3%                                                           | 13.7%                                                           | 56.3%                                                     |                              |
| Other                                        | 3.6%                                                     | 3.2%                                                           | 3.2%                                                            | 5.2%                                                      |                              |
| Mechanism                                    |                                                          |                                                                |                                                                 |                                                           | $< .001$                     |
| Falls                                        | 49.8%                                                    | 51.7%                                                          | 47.3%                                                           | 35.4%                                                     |                              |
| Firearms                                     | 1.0%                                                     | 0.4%                                                           | 1.0%                                                            | 5.1%                                                      |                              |
| Motor Vehicle                                | 8.0%                                                     | 7.6%                                                           | 8.1%                                                            | 9.6%                                                      |                              |
| Severity (ISS), mean [95% CI]                | 5.0 [4.9, 5.0]                                           | 4.9 [4.9, 4.9]                                                 | 4.7 [4.7, 4.7]                                                  | 4.9 [4.9, 5.0]                                            | $< .001$                     |
| Mortality                                    | 2.4%                                                     | 2.5%                                                           | 2.4%                                                            | 2.6%                                                      | .002                         |
| LOS, median [IQR]                            | 4.0 [2.0, 7.0]                                           | 4.0 [2.0, 7.0]                                                 | 4.0 [2.0, 7.0]                                                  | 4.0 [2.0, 8.0]                                            | $< .001$                     |
| Charges (thousands of dollars), median [IQR] | 22.2 [13.0, 37.8]                                        | 22.7 [13.2, 38.9]                                              | 22.3 [13.0, 38.0]                                               | 23.3 [13.3, 41.7]                                         | $< .001$                     |

NOTES: ISS Injury Severity Score, LOS Length of Stay  
<sup>a</sup> *p*-values for 1-way ANOVA (age, ISS), Kruskal-Wallis (LOS, cost), or chi-square (female, race, mechanism, mortality)

Table 3. Individual descriptive statistics by injury severity group

|                    | Less Severe Injuries<br>ISS $\leq 15$<br>(N = 380,218) | More Severe Injuries<br>ISS $> 15$<br>(N = 25,997) | <i>p</i> -value <sup>a</sup> |
|--------------------|--------------------------------------------------------|----------------------------------------------------|------------------------------|
| Age, mean [95% CI] | 60.6 [60.6, 60.7]                                      | 57.0 [56.7, 57.3]                                  | $< .001$                     |
| Female             | 50.8%                                                  | 35.8%                                              |                              |
| Race               |                                                        |                                                    | $< .001$                     |
| White              | 70.4%                                                  | 64.0%                                              |                              |
| Black              | 25.7%                                                  | 31.1%                                              |                              |
| Other              | 3.9%                                                   | 4.9%                                               |                              |
| Mechanism          |                                                        |                                                    | $< .001$                     |

|                                        |               |              |              |        |
|----------------------------------------|---------------|--------------|--------------|--------|
|                                        | Falls         | 44.4%        | 41.7%        |        |
|                                        | Firearms      | 2.0%         | 8.1%         |        |
|                                        | Motor Vehicle | 7.4%         | 24.2%        |        |
| Mortality                              |               | 2.1%         | 8.2%         | < .001 |
| LOS                                    |               | 4.0          | 6.0          | < .001 |
|                                        |               | [2.0, 7.0]   | [3.0, 11.0]  |        |
| Charges (thousands of dollars), median |               | 22.0         | 37.2         | < .001 |
| [IQR]                                  |               | [12.8, 37.5] | [19.6, 80.2] |        |
| Neighborhood poverty rate, median      |               | 12.4         | 13.2         | < .001 |
| [IQR]                                  |               | [6.5, 26.5]  | [6.5, 32.3]  |        |

NOTES: ISS Injury Severity Score, LOS Length of Stay

<sup>a</sup> *p*-values for 1-way ANOVA (age), Kruskal-Wallis (LOS, cost), or chi-square (female, race, mechanism, mortality)

Table 4 presents the variance decomposition results for the full and stratified samples, along with the number of patients included in each model. All patients were included in analyses of mortality. Sample sizes for analyses of length of stay were somewhat smaller, likely reflecting patients who were transported to a hospital but died before admission (1.8% of the full sample was lost at this stage). Total charge data were available for only a subset of patients, due to under-reporting of this variable by hospitals (31.4% of the total sample was lost at this stage). Supplemental analyses (not shown) indicated that patients with missing charge data were substantially more likely to be black, male, and live in high-poverty neighborhoods. A substantial proportion of this missing data may be due to hospitals waiving or not reporting charges for uninsured patients with means to pay, and thus directly confounded with the aims of the study. Charge results should therefore be interpreted with some caution.

Table 4. Variance decomposition statistics

|  | Hospital | Neighborhood | Residual | Patient | Hospital | ZIP    |
|--|----------|--------------|----------|---------|----------|--------|
|  | Variance | Variance     | Variance | N       | N        | code N |
|  |          |              |          |         |          |        |

|                                           | (ICC) | (ICC) | (ICC) |         |    |     |
|-------------------------------------------|-------|-------|-------|---------|----|-----|
| <b>All Injuries</b>                       |       |       |       |         |    |     |
| Mortality                                 | 15.4% | 0.8%  | 83.8% | 404,675 | 66 | 214 |
| Length of Stay                            | 36.2% | 0.2%  | 63.6% | 397,564 | 66 | 214 |
| Total Charges                             | 37.7% | 0.2%  | 62.2% | 276,478 | 66 | 214 |
| <b>Less Severe Injuries (ISS ≤ 15)</b>    |       |       |       |         |    |     |
| Mortality                                 | 12.3% | 0.4%  | 87.3% | 378,788 | 66 | 214 |
| Length of Stay                            | 15.8% | 0.2%  | 84.0% | 370,933 | 66 | 214 |
| Total Charges                             | 33.0% | 0.1%  | 66.9% | 258,744 | 66 | 214 |
| <b>More Severe Injuries (ISS &gt; 15)</b> |       |       |       |         |    |     |
| Mortality                                 | 4.8%  | 0.4%  | 94.8% | 25,887  | 64 | 212 |
| Length of Stay                            | 21.3% | 1.3%  | 77.3% | 25,150  | 64 | 212 |
| Total Charges                             | 17.7% | 0.8%  | 81.4% | 17,734  | 64 | 212 |
| <b>All Falls</b>                          |       |       |       |         |    |     |
| Mortality                                 | 2.9%  | 0.2%  | 96.9% | 117,454 | 65 | 213 |
| Length of Stay                            | 20.5% | 0.5%  | 79.3% | 115,334 | 65 | 213 |
| Total Charges                             | 25.0% | 0.1%  | 74.9% | 78,166  | 65 | 213 |
| <b>All Firearms</b>                       |       |       |       |         |    |     |
| Mortality                                 | 20.1% | 0.8%  | 79.1% | 6,498   | 52 | 178 |
| Length of Stay                            | 11.5% | 0.3%  | 88.2% | 6,089   | 52 | 178 |
| Total Charges                             | 18.4% | 0.03% | 81.5% | 3,151   | 52 | 178 |
| <b>All Motor Vehicle</b>                  |       |       |       |         |    |     |
| Mortality                                 | 4.7%  | 1.1%  | 94.2% | 22,604  | 65 | 211 |

|                |       |      |       |        |    |     |
|----------------|-------|------|-------|--------|----|-----|
| Length of Stay | 13.1% | 0.3% | 86.6% | 21,457 | 65 | 211 |
| Total Charges  | 21.6% | 0.6% | 77.8% | 12,725 | 65 | 211 |

NOTES: ICC Intraclass Correlation Coefficient

There was significant variance at the hospital level across outcomes and trauma mechanism, although the extent of this variance ranged from 2.9% for mortality due to falls to 37.7% for total charges across all injury mechanisms. Neighborhood variance was minimal across outcomes and mechanism as well, with the highest estimate being 1.1% for motor vehicle traffic mortality. The extent of variance at the hospital levels was somewhat reduced but still substantial in the analyses stratified by both injury severity and by trauma mechanism. Hence, clustering of risk types did not appear to fully explain inter-hospital differences.

## DISCUSSION

The persistence of disparities in health outcomes is an important concern for public policy makers and for hospital administrators. These results reflect a growing literature finding substantial between-hospital differences in outcomes for injured patients, related to hospital factors including patient volume<sup>25</sup>, trauma level designation<sup>26</sup>, and treatment efficiency<sup>27</sup>. This analysis addresses two important issues. First, the extent of disparity in outcomes from trauma treatment has received relatively little attention, with most research focusing primarily on treatment of acute and chronic disease. Second, a longstanding question has been the relative importance of placement of care facilities versus neighborhood risk factors and individual differences in creating patterns of geographic health inequality – i.e., do marginalized neighborhoods suffer because they have access to hospitals that have worse outcomes; because they exhibit environmental risk factors like exposure to greater violence, more toxic substances,

1  
2  
3 and generally unsanitary and stressful conditions; or because their populations have other  
4  
5 underlying risk factors, like higher rates of chronic disease and lower levels of insurance  
6  
7 coverage, unrelated to specific neighborhood conditions.  
8  
9

10 With respect to the first question, these results suggest that there are substantial  
11  
12 disparities in trauma outcomes related to factors outside of the facts of the trauma case and  
13  
14 individual differences in trauma patients. Ideally, these individual factors (represented here as  
15  
16 part of the residual variance) should account for all of the variance in outcomes – patient  
17  
18 outcomes should be equal across hospitals and across neighborhoods. Regarding the second  
19  
20 question, these data indicate that identifiable inequalities account for between 3% and 36% of  
21  
22 outcomes, depending on the outcome and trauma type examined. They also suggest that most of  
23  
24 these disparities in trauma outcomes appear to be due to hospital-level disparities, with the  
25  
26 independent influence of neighborhood being comparatively trivial. This lends support to the  
27  
28 view that geographic disparities in trauma outcomes (at least within the specific context of the  
29  
30 Detroit metropolitan area) seem to be mainly due to differences in care provided by facilities  
31  
32 available in these areas.  
33  
34  
35  
36

37 Comparative analyses based on neighborhood poverty levels and injury severity  
38  
39 illustrates some potentially confounding factors. For example, patients living in high-poverty  
40  
41 neighborhoods tend to be at higher risk for negative outcomes in some regards – particularly in  
42  
43 terms of incidence of firearm injuries – but they are also substantially younger on average, and  
44  
45 thus may suffer from fewer risks related to comorbid conditions, which tend to increase with age.  
46  
47 Hospital-level disparities in outcomes remained after stratifying the analyses by injury severity  
48  
49 and by mechanism of injury. This suggests that these differences between hospitals are not solely  
50  
51 based on different background case characteristics. Although there are clearly disparities in terms  
52  
53  
54  
55  
56  
57  
58  
59  
60

1  
2  
3 of risk for different types of injury based on geographic location, these differences in caseload do  
4  
5 not appear to fully explain differences in hospital outcomes. Nevertheless, it remains likely that  
6  
7 different patient populations with different risk profiles play an important role in some fraction  
8  
9 of the inter-hospital variability seen here. Although it is beyond the scope of a single study to  
10  
11 identify all of these factors, it remains an important area for focus in future research.  
12  
13

14  
15 These findings suggest that, at least in the case of trauma outcomes, policy should focus  
16  
17 on reducing disparities in treatment quality between hospitals in order to reduce community-level  
18  
19 disparities in outcomes. More broadly, it suggests that factors influencing geographic disparities  
20  
21 in trauma outcomes may arise at the point of treatment, rather than being the result of different  
22  
23 levels of risk derived from the neighborhood environment, at least when considered within a  
24  
25 single metropolitan area. Disparities in treatment quality may have a number of causes, including  
26  
27 differences in investment, differences in resource allocation, and differences in institutional  
28  
29 experience with treating trauma. In addition to addressing funding and investment disparities,  
30  
31 ways of addressing these differences might include transferring high risk cases to hospitals with  
32  
33 more extensive institutional experience in the relevant field.  
34  
35  
36

37  
38 Limitations of this study include the inherent inability to differentiate hospital-level  
39  
40 variance that may be caused by differences in the patient population served at different  
41  
42 institutions. For example, some institutions may admit a larger volume of more serious traumas,  
43  
44 which may have less favorable outcomes. It is plausible that neighborhood disparities would be  
45  
46 larger if these cases were included. Additionally, our data did not include information on pre-  
47  
48 hospital mortality, which has been identified in previous research as a critical phase for trauma  
49  
50 management<sup>28</sup>. Since there is the potential for significant inequalities in pre-hospital care, for  
51  
52 example due to geographical differences in response times, this is an important element of the  
53  
54  
55  
56  
57  
58  
59  
60

1  
2  
3 trauma care system to address in future research on disparities. Other shortcomings include a  
4  
5 lack of hospital-level data, including trauma level designation, due to limitations on the  
6  
7 Michigan SID data aimed at preserving institutional anonymity. Charge data must be interpreted  
8  
9 with some caution, because charges billed do not necessarily reflect hospital costs, and can vary  
10  
11 between regions based on a variety of factors unrelated to care<sup>29</sup>. Finally, alternative ways of  
12  
13 identifying neighborhood clusters other than ZIP code (e.g., census tracts, or homogeneous ZIP  
14  
15 code groups) might yield more information regarding neighborhood variation. Future research  
16  
17 should seek to create and validate better methods of defining neighborhoods.  
18  
19  
20

21 As policy-makers look for ways to reduce both disparities in trauma outcomes and the  
22  
23 cost of providing care for traumatic injury, it is important to have a clear picture of the extent to  
24  
25 which they differ as a function of local geography. This study represents a step towards  
26  
27 addressing that question, indicating that differences between hospitals may play an important  
28  
29 role in determining the extent of these differences.  
30  
31  
32  
33  
34  
35  
36  
37  
38  
39  
40  
41  
42  
43  
44  
45  
46  
47  
48  
49  
50  
51  
52  
53  
54  
55  
56  
57  
58  
59  
60

1  
2  
3 CONFLICT OF INTEREST STATEMENT:  
4

5 The authors have no conflicting interests to declare.  
6

7  
8 AUTHOR CONTRIBUTIONS  
9

10 LS, RH, and MF drafted the manuscript. RH conducted the statistical analyses. LS and EE  
11 developed the research questions. All authors reviewed and revised the manuscript.  
12  
13

14  
15 DATA STATEMENT  
16

17 Data from the State Inpatient Database (SID for the state of Michigan for the years 2006 – 2014  
18 were obtained from the Agency for Health Research and Quality's (AHRQ) Healthcare Cost and  
19 Utilization Project (HCUP). These data are available for purchase from AHRQ at  
20  
21  
22  
23  
24 <http://www.hcup-us.ahrq.gov/>  
25

26  
27 FUNDING  
28

29 This research received no specific grant from any funding agency in the public, commercial or  
30 not-for-profit sectors.  
31  
32  
33  
34  
35  
36  
37  
38  
39  
40  
41  
42  
43  
44  
45  
46  
47  
48  
49  
50  
51  
52  
53  
54  
55  
56  
57  
58  
59  
60



## References

1. Adler, N. E. & Rehkopf, D. H. U.S. Disparities in Health: Descriptions, Causes, and Mechanisms. *Annu. Rev. Public Health* **29**, 235–252 (2008).
2. Howell, E. A., Hebert, P., Chatterjee, S., Kleinman, L. C. & Chassin, M. R. Black/white differences in very low birth weight neonatal mortality rates among New York City hospitals. *Pediatrics* **121**, e407–e415 (2008).
3. Freedman, V. A., Martin, L. G. & Schoeni, R. F. Recent trends in disability and functioning among older adults in the united states: A systematic review. *J. Am. Med. Assoc.* **288**, 3137–3146 (2002).
4. Juarez, P. D. *et al.* The public health exposome: a population-based, exposure science approach to health disparities research. *Int. J. Environ. Res. Public. Health* **11**, 12866–12895 (2014).
5. Jackson, J. S., Knight, K. M. & Rafferty, J. A. Race and Unhealthy Behaviors: Chronic Stress, the HPA Axis, and Physical and Mental Health Disparities Over the Life Course. *Am. J. Public Health* **100**, 933–939 (2010).
6. Dimick, J., Ruhter, J., Sarrazin, M. V. & Birkmeyer, J. D. Black patients more likely than whites to undergo surgery at low-quality hospitals in segregated regions. *Health Aff. (Millwood)* **32**, 1046–1053 (2013).
7. Haider, A. H. *et al.* Disparities in trauma care and outcomes in the United States: A systematic review and meta-analysis. *J. Trauma Acute Care Surg.* **74**, 1195–1205 (2013).
8. Maybury, R. S. *et al.* Pedestrians struck by motor vehicles further worsen race- and insurance-based disparities in trauma outcomes: The case for inner-city pedestrian injury prevention programs. *Surgery* **148**, 202–208 (2010).

- 1  
2  
3 9. Reimers, A. & Laflamme, L. Hip Fractures Among the Elderly: Personal and Contextual  
4  
5 Social Factors That Matter. *J. Trauma Acute Care Surg.* **62**, 365–369 (2007).  
6
- 7  
8 10. Corrigan, J. D. & Bogner, J. A. Neighborhood Characteristics and Outcomes After  
9  
10 Traumatic Brain Injury. *Arch. Phys. Med. Rehabil.* **89**, 912–921 (2008).  
11
- 12  
13 11. Iceland, J. & Sharp, G. White Residential Segregation in U.S. Metropolitan Areas:  
14  
15 Conceptual Issues, Patterns, and Trends from the U.S. Census, 1980 to 2010. *Popul. Res.*  
16  
17 *Policy Rev.* **32**, 663–686 (2013).  
18
- 19  
20 12. Bergeron, E., Lavoie, A., Moore, L., Clas, D. & Rossignol, M. Comorbidity and age are  
21  
22 both independent predictors of length of hospitalization in trauma patients. *Can. J. Surg.* **48**,  
23  
24 361 (2005).  
25
- 26  
27 13. Moore, L. *et al.* Using information on preexisting conditions to predict mortality from  
28  
29 traumatic injury. *Ann. Emerg. Med.* **52**, 356–364.e2 (2008).  
30
- 31  
32 14. Tsai, T. C., Orav, E. J. & Jha, A. K. Patient Satisfaction and Quality of Surgical Care in  
33  
34 US Hospitals. *Ann. Surg.* **261**, 2–8 (2015).  
35
- 36  
37 15. Hasnain-Wynia, R., Baker, Nerenz, D. & *et al.* Disparities in health care are driven by  
38  
39 where minority patients seek care: Examination of the hospital quality alliance measures.  
40  
41 *Arch. Intern. Med.* **167**, 1233–1239 (2007).  
42
- 43  
44 16. Vettukattil, A. S. *et al.* Do Trauma Safety-Net Hospitals Deliver Truly Safe Trauma  
45  
46 Care? A Multilevel Analysis of the National Trauma Data Bank. *J. Trauma Acute Care Surg.*  
47  
48 **70**, 978–984 (2011).  
49
- 50  
51 17. Darden, J., Rahbar, M., Jezierski, L., Li, M. & Velie, E. The Measurement of  
52  
53 Neighborhood Socioeconomic Characteristics and Black and White Residential Segregation in  
54  
55  
56  
57  
58  
59  
60

- 1  
2  
3 Metropolitan Detroit: Implications for the Study of Social Disparities in Health. *Ann. Assoc.*  
4  
5 *Am. Geogr.* **100**, 137–158 (2010).  
6  
7  
8 18. Healthcare Cost and Utilization Project (HCUP). *HCUP State Inpatient Databases (SID)*.  
9  
10 (Agency for Healthcare Research and Quality, 2006).  
11  
12 19. Clark, D. E., Black, A. W., Skavdahl, D. H. & Hallagan, L. D. Open-access programs for  
13  
14 injury categorization using ICD-9 or ICD-10. *Inj. Epidemiol.* **5**, 11 (2018).  
15  
16 20. Sears, J. M., Blonar, L. & Bowman, S. M. Predicting work-related disability and medical  
17  
18 cost outcomes: A comparison of injury severity scoring methods. *Injury* **45**, 16–22 (2014).  
19  
20 21. Greene, N. H., Kernic, M. A., Vavilala, M. S. & Rivara, F. P. Validation of ICDPIC  
21  
22 software injury severity scores using a large regional trauma registry. *Inj. Prev.* **21**, 325  
23  
24 (2015).  
25  
26 22. U. S. Census Bureau. *American FactFinder*. (2014).  
27  
28 23. Brown, H. & Prescott, R. *Applied mixed models in medicine*. (John Wiley & Sons, 2014).  
29  
30 24. Nakagawa, S., Johnson, P. C. D. & Schielzeth, H. The coefficient of determination R<sup>2</sup>  
31  
32 and intra-class correlation coefficient from generalized linear mixed-effects models revisited  
33  
34 and expanded. *J. R. Soc. Interface* **14**, (2017).  
35  
36 25. Nathens AB, Jurkovich GJ, Maier RV & et al. Relationship between trauma center  
37  
38 volume and outcomes. *JAMA* **285**, 1164–1171 (2001).  
39  
40 26. Demetriades, D. *et al.* The effect of trauma center designation and trauma volume on  
41  
42 outcome in specific severe injuries. *Ann. Surg.* **242**, 512–519 (2005).  
43  
44 27. Novack, V., Jotkowitz, A., Etzion, O. & Porath, A. Does delay in surgery after hip  
45  
46 fracture lead to worse outcomes? A multicenter survey. *Int. J. Qual. Health Care* **19**, 170–176  
47  
48 (2007).  
49  
50  
51  
52  
53  
54  
55  
56  
57  
58  
59  
60

- 1  
2  
3 28. Kleber, C. *et al.* Overall Distribution of Trauma-related Deaths in Berlin 2010:  
4  
5 Advancement or Stagnation of German Trauma Management? *World J. Surg.* **36**, 2125–2130  
6  
7 (2012).  
8  
9
- 10 29. Wakeam, E. *et al.* Variation in the cost of 5 common operations in the United States.  
11  
12 *Surgery* **162**, 592–604 (2017).  
13  
14  
15  
16  
17  
18  
19  
20  
21  
22  
23  
24  
25  
26  
27  
28  
29  
30  
31  
32  
33  
34  
35  
36  
37  
38  
39  
40  
41  
42  
43  
44  
45  
46  
47  
48  
49  
50  
51  
52  
53  
54  
55  
56  
57  
58  
59  
60

## STROBE Statement—checklist of items that should be included in reports of observational studies

|                              | <b>Item No</b> | <b>Recommendation</b>                                                                                                                                                                                                                                                                                                                                                                            |
|------------------------------|----------------|--------------------------------------------------------------------------------------------------------------------------------------------------------------------------------------------------------------------------------------------------------------------------------------------------------------------------------------------------------------------------------------------------|
| <b>Title and abstract</b>    | 1              | (a) Indicate the study's design with a commonly used term in the title or the abstract<br><b>Page 1</b><br>(b) Provide in the abstract an informative and balanced summary of what was done and what was found<br><b>Page 2</b>                                                                                                                                                                  |
| <b>Introduction</b>          |                |                                                                                                                                                                                                                                                                                                                                                                                                  |
| Background/rationale         | 2              | Explain the scientific background and rationale for the investigation being reported<br><b>Pages 1 – 5</b>                                                                                                                                                                                                                                                                                       |
| Objectives                   | 3              | State specific objectives, including any prespecified hypotheses<br><b>Page 5</b>                                                                                                                                                                                                                                                                                                                |
| <b>Methods</b>               |                |                                                                                                                                                                                                                                                                                                                                                                                                  |
| Study design                 | 4              | Present key elements of study design early in the paper<br><b>Pages 5 – 7</b>                                                                                                                                                                                                                                                                                                                    |
| Setting                      | 5              | Describe the setting, locations, and relevant dates, including periods of recruitment, exposure, follow-up, and data collection<br><b>Pages 5 – 6</b>                                                                                                                                                                                                                                            |
| Participants                 | 6              | (a) <i>Cross-sectional study</i> —Give the eligibility criteria, and the sources and methods of selection of participants<br><b>Pages 5 – 6</b>                                                                                                                                                                                                                                                  |
| Variables                    | 7              | Clearly define all outcomes, exposures, predictors, potential confounders, and effect modifiers. Give diagnostic criteria, if applicable<br><b>Page 6</b>                                                                                                                                                                                                                                        |
| Data sources/<br>measurement | 8*             | For each variable of interest, give sources of data and details of methods of assessment (measurement). Describe comparability of assessment methods if there is more than one group<br><b>Pages 5 – 6</b>                                                                                                                                                                                       |
| Bias                         | 9              | Describe any efforts to address potential sources of bias<br><b>Page 7</b>                                                                                                                                                                                                                                                                                                                       |
| Study size                   | 10             | Explain how the study size was arrived at<br><b>Page 8</b>                                                                                                                                                                                                                                                                                                                                       |
| Quantitative variables       | 11             | Explain how quantitative variables were handled in the analyses. If applicable, describe which groupings were chosen and why<br><b>Pages 6 – 7</b>                                                                                                                                                                                                                                               |
| Statistical methods          | 12             | (a) Describe all statistical methods, including those used to control for confounding<br><b>Page 7</b><br>(b) Describe any methods used to examine subgroups and interactions<br><b>Page 7</b><br>(c) Explain how missing data were addressed<br><b>Page 7</b><br>(d) <i>Cross-sectional study</i> —If applicable, describe analytical methods taking account of sampling strategy<br><b>N/A</b> |

(e) Describe any sensitivity analyses

N/A

Continued on next page

**Results**

|                          |     |                                                                                                                                                                                                                                                                                                                                                                                                                                                         |
|--------------------------|-----|---------------------------------------------------------------------------------------------------------------------------------------------------------------------------------------------------------------------------------------------------------------------------------------------------------------------------------------------------------------------------------------------------------------------------------------------------------|
| Participants             | 13* | (a) Report numbers of individuals at each stage of study—eg numbers potentially eligible, examined for eligibility, confirmed eligible, included in the study, completing follow-up, and analysed<br><b>Page 8</b><br>(b) Give reasons for non-participation at each stage<br><b>N/A</b><br>(c) Consider use of a flow diagram<br><b>N/A</b>                                                                                                            |
| Descriptive data         | 14* | (a) Give characteristics of study participants (eg demographic, clinical, social) and information on exposures and potential confounders<br><b>Page 8</b><br>(b) Indicate number of participants with missing data for each variable of interest<br><b>Table 1</b>                                                                                                                                                                                      |
| Outcome data             | 15* | <i>Cross-sectional study</i> —Report numbers of outcome events or summary measures<br><b>Table 1</b>                                                                                                                                                                                                                                                                                                                                                    |
| Main results             | 16  | (a) Give unadjusted estimates and, if applicable, confounder-adjusted estimates and their precision (eg, 95% confidence interval). Make clear which confounders were adjusted for and why they were included<br><b>N/A</b><br>(b) Report category boundaries when continuous variables were categorized<br><b>N/A</b><br>(c) If relevant, consider translating estimates of relative risk into absolute risk for a meaningful time period<br><b>N/A</b> |
| Other analyses           | 17  | Report other analyses done—eg analyses of subgroups and interactions, and sensitivity analyses<br><b>Page 8 &amp; Table 1</b>                                                                                                                                                                                                                                                                                                                           |
| <b>Discussion</b>        |     |                                                                                                                                                                                                                                                                                                                                                                                                                                                         |
| Key results              | 18  | Summarise key results with reference to study objectives<br><b>Page 9</b>                                                                                                                                                                                                                                                                                                                                                                               |
| Limitations              | 19  | Discuss limitations of the study, taking into account sources of potential bias or imprecision. Discuss both direction and magnitude of any potential bias<br><b>Page 10</b>                                                                                                                                                                                                                                                                            |
| Interpretation           | 20  | Give a cautious overall interpretation of results considering objectives, limitations, multiplicity of analyses, results from similar studies, and other relevant evidence<br><b>Pages 9 – 10</b>                                                                                                                                                                                                                                                       |
| Generalisability         | 21  | Discuss the generalisability (external validity) of the study results<br><b>Page 9</b>                                                                                                                                                                                                                                                                                                                                                                  |
| <b>Other information</b> |     |                                                                                                                                                                                                                                                                                                                                                                                                                                                         |
| Funding                  | 22  | Give the source of funding and the role of the funders for the present study and, if applicable,                                                                                                                                                                                                                                                                                                                                                        |

1  
2 for the original study on which the present article is based

3 N/A

4  
5 \*Give information separately for cases and controls in case-control studies and, if applicable, for exposed and  
6 unexposed groups in cohort and cross-sectional studies.  
7

8  
9 **Note:** An Explanation and Elaboration article discusses each checklist item and gives methodological background and  
10 published examples of transparent reporting. The STROBE checklist is best used in conjunction with this article (freely  
11 available on the Web sites of PLoS Medicine at <http://www.plosmedicine.org/>, Annals of Internal Medicine at  
12 <http://www.annals.org/>, and Epidemiology at <http://www.epidem.com/>). Information on the STROBE Initiative is  
13 available at [www.strobe-statement.org](http://www.strobe-statement.org).  
14  
15  
16  
17  
18  
19  
20  
21  
22  
23  
24  
25  
26  
27  
28  
29  
30  
31  
32  
33  
34  
35  
36  
37  
38  
39  
40  
41  
42  
43  
44  
45  
46  
47  
48  
49  
50  
51  
52  
53  
54  
55  
56  
57  
58  
59  
60

# BMJ Open

## Between-hospital and between-neighborhood variance in trauma outcomes: Cross-sectional observational evidence from the Detroit metropolitan area

|                                 |                                                                                                                                                                                                                                                           |
|---------------------------------|-----------------------------------------------------------------------------------------------------------------------------------------------------------------------------------------------------------------------------------------------------------|
| Journal:                        | <i>BMJ Open</i>                                                                                                                                                                                                                                           |
| Manuscript ID                   | bmjopen-2018-022090.R2                                                                                                                                                                                                                                    |
| Article Type:                   | Research                                                                                                                                                                                                                                                  |
| Date Submitted by the Author:   | 09-Oct-2018                                                                                                                                                                                                                                               |
| Complete List of Authors:       | Sall, Lauren; St. John Hospital & Medical Center, Surgery<br>Hayward, R. David; St. John Hospital & Medical Center, Surgery<br>Fessler, Mary; St. John Hospital & Medical Center, Surgery<br>Edhayan, Elango; St. John Hospital & Medical Center, Surgery |
| <b>Primary Subject Heading</b>: | Emergency medicine                                                                                                                                                                                                                                        |
| Secondary Subject Heading:      | Public health, Surgery                                                                                                                                                                                                                                    |
| Keywords:                       | ACCIDENT & EMERGENCY MEDICINE, Quality in health care < HEALTH SERVICES ADMINISTRATION & MANAGEMENT, PUBLIC HEALTH, TRAUMA MANAGEMENT                                                                                                                     |
|                                 |                                                                                                                                                                                                                                                           |

SCHOLARONE™  
Manuscripts



1  
2  
3 Between-hospital and between-neighborhood variance in trauma outcomes: Cross-sectional  
4  
5 observational evidence from the Detroit metropolitan area  
6  
7  
8  
9  
10  
11

12 Lauren Sall, MD

13  
14 R. David Hayward, PhD\*

15  
16 Mary M. Fessler, BA

17  
18 Elango Edhayan, MD, FACS  
19  
20  
21  
22

23 St. John Hospital & Medical Center

24  
25 Department of Surgery  
26  
27

28 Detroit, MI

29  
30 USA  
31  
32  
33  
34  
35  
36  
37

38 WORD COUNT: 2,912

39  
40 KEY WORDS: traumatic injury; health inequalities; neighborhoods; trauma outcomes  
41

42 Direct Correspondence to:

43 R. David Hayward, PhD

44 Senior Medical Researcher

45 Department of Surgery

46 St. John Hospital & Medical Center

47 22151 Moross Rd., PB 1, Suite. 212

48 Detroit, MI 48236

49 USA

50 Phone: (313) 343-3485

51 Email: Richard.Hayward@ascension.org  
52  
53  
54  
55  
56  
57  
58  
59  
60

## ABSTRACT

**OBJECTIVES:** Disparities in treatment outcomes for traumatic injury are an important concern for care providers and policy makers. Factors that may influence these disparities include differences in risk exposure based on neighborhood of residence, and differences in quality of care between hospitals in different areas. This study examines geographic disparities within a single region: the Detroit metropolitan area.

**DESIGN:** Data on all trauma admissions between 2006 and 2014 were obtained from the Michigan State Inpatient Database. Admissions were grouped by patient neighborhood of residence and admitting hospital. Generalized Linear Mixed Modeling procedures were used to determine the extent of shared variance based on these two levels of categorization on three outcomes. Patients with trauma due to common mechanisms (falls, firearms, and motor vehicle traffic) were examined as additional subgroups.

**SETTING:** 66 hospitals admitting patients for traumatic injury in the Detroit metropolitan area during the period from 2006 – 2014.

**PARTICIPANTS:** 404,675 adult patients admitted for treatment of traumatic injury.

**OUTCOME MEASURES:** In-hospital mortality, length of stay, and hospital charges.

**RESULTS:** Intraclass correlation coefficients indicated that there was substantial shared variance in outcomes based on hospital, but not based on neighborhood of residence. Among all injury types, hospital-level differences accounted for 12.5% of variance in mortality risk, 28.5% of variance in length of stay, and 32.2% of variance in hospital charges. Adjusting results for patient age, injury severity, mechanism, and comorbidities did not result in significant reduction in the estimated variance at the hospital level.

1  
2  
3 CONCLUSIONS: Based on these data, geographic disparities in trauma treatment outcomes  
4  
5 were more strongly attributable to differences in access to quality hospital care than to risk  
6  
7 factors in the neighborhood environment. Transfer of high-risk cases to hospitals with greater  
8  
9 institutional experience in the relevant area may help address mortality disparities in particular.  
10  
11  
12  
13

#### 14 STRENGTHS AND LIMITATIONS OF THIS STUDY

- 16 • Data covers all hospital admissions in a major metropolitan area over a 9-year period
- 17
- 18 • Multi-level analysis allows decomposition of differences in patient outcomes shared
- 19
- 20 within neighborhood of residence and hospital of treatment
- 21
- 22
- 23 • Range of outcomes including mortality, length of stay, and hospital charges
- 24
- 25
- 26 • Cannot assess mortality occurring before hospital admission
- 27
- 28
- 29 • Differences in intake patterns may increase between-hospital variance
- 30
- 31
- 32
- 33
- 34
- 35
- 36
- 37
- 38
- 39
- 40
- 41
- 42
- 43
- 44
- 45
- 46
- 47
- 48
- 49
- 50
- 51
- 52
- 53
- 54
- 55
- 56
- 57
- 58
- 59
- 60

## INTRODUCTION

The persistence of disparities in patient outcomes is a serious challenge for the US health care system<sup>1</sup>. People with low incomes and members of racial and ethnic minority groups experience worse health outcomes across a broad spectrum, from lower birth weight<sup>2</sup> to greater risk of functional disability in older adulthood<sup>3</sup>. The causes of these disparities are complex and multifaceted, including differing levels of environmental exposure to health hazards<sup>4</sup>, cultural differences in health behaviors<sup>5</sup>, and unequal access to quality care<sup>6</sup>. Within the field of health disparities research, traumatic injury has received relatively little attention in comparison to areas such as chronic disease and infection<sup>7</sup>. Nevertheless, there is a significant body of evidence finding that factors including race<sup>7,8</sup> and socioeconomic status<sup>9,10</sup> may affect patients' risk of negative outcomes following trauma treatment.

The local geography of cities may play an important role in forming these disparities. Cities in the US remain heavily segregated by both race and socioeconomic status, with sharp differences in the demographic makeup of neighborhoods that may be in close proximity to one another<sup>11</sup>. These neighborhoods may differ in terms of the risks they pose for traumatic injury. For example, socioeconomically-disadvantaged neighborhoods may have higher rates of trauma from causes like assault, which may entail greater risks of poorer outcomes. More broadly, residents of marginalized neighborhoods may face greater background health challenges, leaving them more likely to suffer from multiple comorbidities that are likely to complicate recovery from traumatic injury<sup>12,13</sup>.

A related facet of metropolitan geography potentially impacting trauma outcomes relates to hospital quality and access. Quality of care issues are an increasing concern in the realm of public policy<sup>14</sup>. Large cities contain numerous hospitals providing emergency trauma care, and

1  
2  
3 most trauma patients are likely to be receive treatment at facilities in close proximity to the  
4 places in which they live. Hospitals and other health care facilities serving primarily poor and  
5 marginalized local populations may face challenges with funding levels and patient demands that  
6 inhibit care quality<sup>6,15</sup>. Insurance issues and patient familiarity may also serve to funnel high-risk  
7 patients towards under-resourced hospitals, as patients may be more likely to opt to seek care at  
8 institutions with which they are more familiar, and which they may perceive as less costly<sup>16</sup>.  
9  
10  
11  
12  
13  
14  
15  
16

17 The extent to which these two aspects of local geography within metropolitan areas—  
18 residential neighborhood and care facility – may be related to trauma outcomes has not been  
19 thoroughly assessed. In this study, we use data from all trauma patients admitted for traumatic  
20 injury to hospitals in the Detroit metropolitan area between 2006 and 2014 and apply statistical  
21 techniques to determine the extent to which three outcomes (mortality, length of hospital stay,  
22 and hospital charges) differ as a function of (a) the neighborhoods in which patients reside, and  
23 (b) the hospital providing care. The Detroit metropolitan area has some of the highest levels of  
24 residential racial and ethnic segregation in the US, as well as some of the most extreme  
25 economic inequalities<sup>17</sup>. As a region that has experienced a historical pattern of economic decline  
26 and rejuvenation, as well as successive waves of movement between urban and suburban  
27 neighborhoods, it serves to exemplify a number of the socioeconomic challenges facing policy  
28 makers and health care providers in numerous US cities. It has a well-developed emergency and  
29 trauma infrastructure, including three hospitals with ACS Level I trauma designation and 13 with  
30 Level II designation during the period covered by this study.  
31  
32  
33  
34  
35  
36  
37  
38  
39  
40  
41  
42  
43  
44  
45  
46  
47  
48

## 49 METHOD

50  
51 Individual-level admissions data for this project were obtained from the Healthcare Cost  
52 and Utilization Project (HCUP), sponsored by the Agency for Health Research and Quality  
53  
54  
55  
56  
57  
58  
59  
60

1  
2  
3 (AHRQ). One element of the HCUP is the compilation of an annual database including medical  
4 details of all hospital discharges in each state, known as the State Inpatient Database (SID).

5  
6  
7 Ethical approval for use of the data was granted by the Institutional Review Board of St. John  
8 Hospital and Medical Center. Because the data were derived from clinical patient records and  
9  
10 were fully anonymous and de-identified, participant consent was not required.  
11  
12  
13

14  
15 Data for the present analyses come from the Michigan SID for the period of years from  
16 2006 to 2014<sup>18</sup>. Patients residing in the Detroit Metropolitan Statistical Area (MSA) were  
17 identified using the US Census Bureau definition as consisting of Wayne, Lapeer, Livingston,  
18 Macomb, Oakland, and St. Clair counties. Trauma cases were identified using ICD-9 diagnostic  
19 codes present at admission (ICD-9 codes 800 – 959 were included; no exclusions were made for  
20 codes indicating late effects of trauma or superficial injuries).  
21  
22  
23  
24  
25  
26  
27

28  
29 Hospitals. Each record in the SID includes a unique, anonymized, identification code  
30 corresponding to the hospital to which the patient was admitted. This allows patients to be  
31 clustered according to hospital. After excluding institutions with fewer than 100 trauma  
32 admissions during the 9-year study period, there were a total of 66 hospitals represented in the  
33 data, with a median of 2,845 observations in each cluster.  
34  
35  
36  
37  
38  
39

40  
41 Neighborhoods. Patient residence was identified by ZIP code in the SID, and in this study  
42 each ZIP code is treated as a separate neighborhood. There were a total of 214 neighborhoods  
43 represented in the data, with a median of 1,633 observations in each.  
44  
45  
46

47  
48 Patient outcomes. Patient outcomes include in-hospital mortality, length of stay, and total  
49 hospital charges. Mortality was derived from the case disposition code (0 = did not die, 1 =  
50 died). Length of stay is given by the number of days between admission and discharge. Total  
51  
52  
53  
54  
55  
56  
57  
58  
59  
60

1  
2  
3 hospital charges is a dollar amount corresponding to the total amount billed to any payer for each  
4 admission.  
5

6  
7 Patient comorbidities. The SID database includes data on a range of comorbid conditions  
8 (i.e., medical conditions existing prior to the present hospitalization episode). Examples include  
9 asthma, substance abuse, and obesity. The total number of comorbidities noted in each patient's  
10 record was computed to serve as an index of underlying patient health for the purposes of these  
11 analyses.  
12  
13  
14  
15  
16  
17

18  
19 Trauma mechanism. Trauma mechanisms are derived from ICD-9 diagnosis codes  
20 included for each admission case in the SID. The three most common specific mechanisms in  
21 this sample were examined in these analyses: falls, firearms, and motor vehicle traffic.  
22  
23  
24  
25

26 Injury severity. ICD-9 diagnosis codes included in the SID were used to calculate  
27 estimated injury severity scores (ISS) for all patients. This procedure was carried out using  
28 ICDPIC-R<sup>19</sup>, an open-source program executed in the R statistical environment which computes  
29 abbreviated injury score (AIS) by body region based on ICD-9 codes, and then calculates an  
30 estimated ISS based on regional AIS, and is based on a set of procedures that have been  
31 extensively validated for this purpose<sup>20,21</sup>.  
32  
33  
34  
35  
36  
37  
38  
39

40 Patient and neighborhood demographics. Individual demographics included age (in  
41 years), gender, and race (white, black, or other). Neighborhood socioeconomic status (SES) was  
42 measured using ZIP code-level poverty rate estimates published by the US Census Bureau<sup>22</sup>.  
43 These estimates represent a three-year rolling average (e.g., the estimates for 2014 represent data  
44 from 2012 – 2014). Because poverty rate data were not made available until 2012, whereas this  
45 study covers the period from 2006 – 2014, neighborhood SES is represented in this study as a  
46 single rate regardless of year (rather than varying across time), using data from 2014. It was not  
47  
48  
49  
50  
51  
52  
53  
54  
55  
56  
57  
58  
59  
60

possible to include information about hospital characteristics (e.g., trauma level designation) because the Michigan SID excludes identifiers that would enable cross-referencing hospital IDs with American Hospital Association data.

#### Analytical approach

In this study, we use a generalized linear mixed modeling (GLMM) framework to estimate the proportion of variance in individual outcomes that is attributable to each of three levels: hospitals, neighborhoods, and individuals (i.e., residual variance after hospital and neighborhood variance has been accounted for). The GLMM method<sup>23</sup> is a statistical modeling technique which includes a mixture of fixed and random effects. Random effects represent shared group-level linear relationships. Individual outcome values are allowed to vary at random around a group mean, allowing for an estimate of the part of the outcome that varies between groups and that varying between individuals. In these analyses, random intercept effects are specified for both hospital and neighborhood, meaning that individual outcomes are allowed to vary at random around both a hospital mean and a neighborhood mean. The group-level design matrix is specified as cross-classified, meaning that both sets of higher-level clusters are included in the same model, with each individual belonging to both a hospital and neighborhood cluster. Because the distributions of the outcome variables are not the same, different linking functions are used in GLMM models with different outcomes. Mortality is a binary variable, and uses a binary linking function. Length of stay and total charges both have highly skewed continuous distributions, making the use of a longnormal linking function appropriate.

The proportion of variance at the group level is given by the intra-class correlation coefficient (ICC) corresponding to the level of clustering (in this case, hospital and neighborhood). For outcomes with a non-binary function (i.e., length of stay and charges), the



1  
2  
3 ICC is computed by dividing the group-level variance parameter by the sum of the group and  
4 residual variance parameters. For binary GLMM (i.e., mortality), the ICC is given by dividing  
5 the group-level variance parameter by the sum of the group-level parameter and 3.29, an estimate  
6 of the theoretical variance in the binomial distribution<sup>24</sup>. In the results, these figures are  
7 expressed as a percentage of the total variance at each level. Cases with missing outcome data  
8 were excluded on a pairwise basis. LOS and charge analyses exclude cases with in-hospital  
9 mortality.

10  
11 For each analysis, two GLMM models are computed. The first model includes random  
12 effects only, and provides an estimate of the total variance at each level, ignoring differences in  
13 outcomes arising due to systematic between-group differences in patient demographics and  
14 injury characteristics. The second model includes add fixed effects to control for some of these  
15 differences in casemix, including patient age, number of comorbidities, ISS, and mechanism of  
16 injury. By comparing the confidence intervals of the ICC estimates, it is possible to evaluate  
17 whether or not a significant proportion of the shared variance at each random effects level can be  
18 attributed to the factors controlled for as fixed effects. Analyses were conducted using SAS 9.4,  
19 except for the estimation of ISS, which was carried out using ICDPIC-R in R 3.5.

#### 20 Patient and Public Involvement

21  
22 This study addresses patient priorities by seeking to better understand how trauma care  
23 systems may be able to reduce patient mortality rates, the length of hospitalization, and charges  
24 incurred. Data are derived from administrative records, so patients were not directly involved in  
25 the design, recruitment, or conduct of the study. Results will be accessible to the public,  
26 including to individuals who may have patients during the study period.

## 27 RESULTS

Table 1 presents descriptive statistics for the full patient sample at the individual, hospital, and neighborhood levels. There were a total of 404,675 admissions for traumatic injury during the time period included in this study, representing a total of 66 hospitals and 214 ZIP codes. The mean number of patients per hospital was 2,845 (IQR: 349 – 9,683), and the mean number per neighborhood was 1,630 (IQR: 765 – 2,879). The three largest subgroups based on mechanism were falls (N = 117,931), motor vehicle traffic (N = 22,755), and firearms (N = 6,512).

Table 1. Descriptive statistics at the individual, hospital, and neighborhood levels

|               | Individual<br>(N = 404,675)<br>Mean (SD) or % | Hospital<br>(N = 66)<br>Median [IQR] | Neighborhood<br>(N = 214)<br>Median [IQR] |
|---------------|-----------------------------------------------|--------------------------------------|-------------------------------------------|
| N individuals |                                               | 2,845<br>[349; 9,683]                | 1,630<br>[765; 2,879]                     |
| Age           | 60.4 (23.7)                                   | 62.0<br>[53.2, 66.6]                 | 60.8<br>[57.3, 65.2]                      |
| Female        | 49.8%                                         | 50.6%<br>[40.1%, 56.7%]              | 50.5%<br>[46.3%, 54.2%]                   |
| Race          |                                               |                                      |                                           |
| White         | 70.0%                                         | 74.6%<br>[40.6%, 91.0%]              | 70.8%<br>[45.5%, 82.4%]                   |
| Black         | 26.0%                                         | 7.6%<br>[2.2%, 19.3%]                | 2.3%<br>[0.9%, 10.0%]                     |
| Other         | 4.0%                                          | 8.2%<br>[3.6%, 23.2%]                | 17.2%<br>[12.0%, 30.7%]                   |
| Mechanism     |                                               |                                      |                                           |
| Falls         | 44.3%                                         | 43.7%<br>[26.9%, 54.1%]              | 46.7%<br>[40.4%, 52.2%]                   |
| Firearms      | 2.4%                                          | 0.4%<br>[0.04%, 1.1%]                | 0.6%<br>[0.2%, 1.4%]                      |
| Motor Vehicle | 8.6%                                          | 5.4%<br>[2.8%, 12.1%]                | 8.4%<br>[7.0%, 10.4%]                     |
| Severity      | 4.9 (5.4)                                     | 4.5<br>[3.5, 5.5]                    | 5.0<br>[4.7, 5.2]                         |
| Comorbidities | 2.7 (2.0)                                     | 2.8<br>[2.0, 3.1]                    | 2.7<br>[2.5, 2.8]                         |
| Mortality     | 2.5%                                          | 2.2%<br>[1.6%, 3.0%]                 | 2.4% [2.0, 2.7%]                          |
| LOS           | 6.4 (8.3)                                     | 5.9                                  | 6.3                                       |

|                        |             |              |              |
|------------------------|-------------|--------------|--------------|
|                        |             | [5.2, 6.7]   | [5.9, 6.7]   |
| Charges                | 36.3 (55.2) | 32.5         | 36.9         |
| (thousands of dollars) |             | [25.5, 41.2] | [33.7, 39.5] |
| Poverty Rate           | 17.4 (14.4) | 14.5         | 10.7         |
|                        |             | [11.8, 19.9] | [6.5, 18.7]  |

Tables 2 and 3 allow for comparisons of case characteristics by neighborhood SES (defined by poverty rate quartiles) and injury severity (defined by cases with ISS up to 15 and those with ISS greater than 15). Patients from the poorest neighborhoods were substantially younger than the patient population as a whole, and were more likely to be male and black. Mortality rates, LOS, and charges were all significantly higher in poorer neighborhoods, but the magnitude of these differences in outcomes was small (e.g., 2.4% mortality in the lowest-quartile poverty neighborhoods, compared with 2.6% in the highest-poverty quartile). Both outcomes and demographics differed substantially by injury severity. Severely injured patients were much more likely to be male, and were somewhat younger and somewhat more likely to be Black. Firearm and MVT mechanisms were also much more common among the more severe injuries. As would be expected, mortality was substantially higher among those with more severe injuries, as were median LOS and charges.

Table 2. Individual descriptive statistics by poverty quartile

|                       | 1 <sup>st</sup> Quartile<br>( $< 6.5\%$ )<br>N = 103,004 | 2 <sup>nd</sup> Quartile<br>( $6.5\% - 10.8\%$ )<br>N = 79,738 | 3 <sup>rd</sup> Quartile<br>( $10.8\% - 18.7\%$ )<br>N = 90,554 | 4 <sup>th</sup> Quartile<br>( $> 18.7\%$ )<br>N = 134,257 | <i>p</i> -value <sup>a</sup> |
|-----------------------|----------------------------------------------------------|----------------------------------------------------------------|-----------------------------------------------------------------|-----------------------------------------------------------|------------------------------|
| Age, mean<br>[95% CI] | 63.9 [63.7,<br>64.0]                                     | 65.1 [64.9,<br>65.2]                                           | 62.3 [62.1, 62.4]                                               | 53.8 [53.6,<br>53.9]                                      | $< .001$                     |
| Female                | 53.0%                                                    | 54.0%                                                          | 52.0%                                                           | 43.4%                                                     | $< .001$                     |
| Race                  |                                                          |                                                                |                                                                 |                                                           | $< .001$                     |
| White                 | 86.9%                                                    | 93.5%                                                          | 83.1%                                                           | 38.5%                                                     |                              |
| Black                 | 9.5%                                                     | 3.3%                                                           | 13.7%                                                           | 56.3%                                                     |                              |
| Other                 | 3.6%                                                     | 3.2%                                                           | 3.2%                                                            | 5.2%                                                      |                              |
| Mechanism             |                                                          |                                                                |                                                                 |                                                           | $< .001$                     |
| Falls                 | 49.8%                                                    | 51.7%                                                          | 47.3%                                                           | 35.4%                                                     |                              |

|                                              |                   |                   |                   |                   |        |
|----------------------------------------------|-------------------|-------------------|-------------------|-------------------|--------|
| Firearms                                     | 1.0%              | 0.4%              | 1.0%              | 5.1%              |        |
| Motor Vehicle                                | 8.0%              | 7.6%              | 8.1%              | 9.6%              |        |
| Severity (ISS), mean [95% CI]                | 5.0 [4.9, 5.0]    | 4.9 [4.9, 4.9]    | 4.7 [4.7, 4.7]    | 4.9 [4.9, 5.0]    | < .001 |
| Comorbidities, mean [95% CI]                 | 2.7 [2.7, 2.7]    | 2.8 [2.8, 2.8]    | 2.9 [2.8, 2.9]    | 2.7 [2.7, 2.7]    | < .001 |
| Mortality                                    | 2.4%              | 2.5%              | 2.4%              | 2.6%              | .002   |
| LOS, median [IQR]                            | 4.0 [2.0, 7.0]    | 4.0 [2.0, 7.0]    | 4.0 [2.0, 7.0]    | 4.0 [2.0, 8.0]    | < .001 |
| Charges (thousands of dollars), median [IQR] | 22.2 [13.0, 37.8] | 22.7 [13.2, 38.9] | 22.3 [13.0, 38.0] | 23.3 [13.3, 41.7] | < .001 |

NOTES: ISS Injury Severity Score, LOS Length of Stay

<sup>a</sup> *p*-values for 1-way ANOVA (age, ISS), Kruskal-Wallis (LOS, cost), or chi-square (female, race, mechanism, mortality)

Table 3. Individual descriptive statistics by injury severity group

|                                              | Less Severe Injuries<br>ISS ≤ 15<br>(N = 380,218) | More Severe Injuries<br>ISS > 15<br>(N = 25,997) | <i>p</i> -value <sup>a</sup> |
|----------------------------------------------|---------------------------------------------------|--------------------------------------------------|------------------------------|
| Age, mean [95% CI]                           | 60.6<br>[60.6, 60.7]                              | 57.0<br>[56.7, 57.3]                             | < .001                       |
| Female                                       | 50.8%                                             | 35.8%                                            |                              |
| Race                                         |                                                   |                                                  | < .001                       |
| White                                        | 70.4%                                             | 64.0%                                            |                              |
| Black                                        | 25.7%                                             | 31.1%                                            |                              |
| Other                                        | 3.9%                                              | 4.9%                                             |                              |
| Mechanism                                    |                                                   |                                                  | < .001                       |
| Falls                                        | 44.4%                                             | 41.7%                                            |                              |
| Firearms                                     | 2.0%                                              | 8.1%                                             |                              |
| Motor Vehicle                                | 7.4%                                              | 24.2%                                            |                              |
| Comorbidities, mean [95% CI]                 | 2.8 [2.7, 2.8]                                    | 2.5 [2.5, 2.5]                                   | < .001                       |
| Mortality                                    | 2.1%                                              | 8.2%                                             | < .001                       |
| LOS                                          | 4.0<br>[2.0, 7.0]                                 | 6.0<br>[3.0, 11.0]                               | < .001                       |
| Charges (thousands of dollars), median [IQR] | 22.0<br>[12.8, 37.5]                              | 37.2<br>[19.6, 80.2]                             | < .001                       |
| Neighborhood poverty rate, median [IQR]      | 12.4<br>[6.5, 26.5]                               | 13.2<br>[6.5, 32.3]                              | < .001                       |

NOTES: ISS Injury Severity Score, LOS Length of Stay

<sup>a</sup> *p*-values for 1-way ANOVA (age), Kruskal-Wallis (LOS, cost), or chi-square (female, race, mechanism, mortality)

Table 4 presents the ICC results for the full and stratified samples, along with the number of patients included in each model. All patients were included in analyses of mortality. Sample sizes for analyses of length of stay were somewhat smaller, likely reflecting patients who were transported to a hospital but died before admission (1.8% of the full sample was lost at this stage). Total charge data were available for only a subset of patients, due to under-reporting of this variable by hospitals (31.4% of the total sample was lost at this stage). Supplemental analyses (not shown) indicated that patients with missing charge data were substantially more likely to be black, male, and live in high-poverty neighborhoods. A substantial proportion of this missing data may be due to hospitals waiving or not reporting charges for uninsured patients with means to pay, and thus directly confounded with the aims of the study. Charge results should therefore be interpreted with some caution.

Table 4. Variance decomposition statistics, all cases

|                                       | Hospital<br>ICC<br>[95% CI] | Neighborhood<br>ICC<br>[95% CI] | Residual ICC<br>[95% CI] | Patient<br>N |
|---------------------------------------|-----------------------------|---------------------------------|--------------------------|--------------|
| Mortality, unadjusted                 | 12.5%<br>[7.4, 17.0]        | 0.4%<br>[0.2, 0.6]              | 87.1%<br>[82.4, 92.3]    | 404,675      |
| Mortality, adjusted for case mix      | 9.3%<br>[5.5, 12.8]         | 0.2%<br>[0.05, 0.4]             | 90.5%<br>[86.9, 94.4]    | 397,170      |
| Length of Stay, unadjusted            | 28.5%<br>[20.6, 35.0]       | 0.3%<br>[0.2, 0.4]              | 71.2%<br>[64.7, 79.1]    | 386,886      |
| Length of Stay, adjusted for case mix | 23.9%<br>[16.9, 29.8]       | 0.2%<br>[0.1, 0.2]              | 76.0%<br>[70.0, 82.9]    | 379,881      |
| Total Charges, unadjusted             | 32.2%<br>[21.7, 40.5]       | 0.2%<br>[0.1, 0.3]              | 67.5%<br>[59.3, 78.1]    | 269,816      |
| Total Charges, adjusted for case mix  | 22.7%<br>[16.5, 28.2]       | 0.3%<br>[0.2, 0.4]              | 77.0%<br>[71.5, 83.3]    | 266,861      |

NOTES: ICC Intraclass Correlation Coefficient; unadjusted models include random effects only, adjusted models include fixed effects for patient age, Injury Severity Scale (ISS), mechanism of injury, and number of patient comorbidities; Hospital N = 66; ZIP code N =

There was significant variance at the hospital level for all outcomes. The extent of the hospital-level variance was significantly higher for LOS and total charges than for mortality. In each case, the magnitude of the ICC estimate was lower in the case mix adjusted model than in the unadjusted model, but none of these differences were statistically significant (i.e., between-hospital differences in the factors controlled in the adjusted model did not account for a significant proportion of the between-hospital disparities in outcomes). Although neighborhood ICC was statistically significant in all of the models presented in Table 4, the magnitude of the variance explained at this level was not clinically meaningful (less than 0.5% in all models).

Table 5. Variance decomposition statistics by injury severity

|                                                       | Hospital<br>ICC<br>[95% CI] | Neighborhood<br>ICC<br>[95% CI] | Residual ICC<br>[95% CI] | Patient<br>N |
|-------------------------------------------------------|-----------------------------|---------------------------------|--------------------------|--------------|
| <b>Less Severe Injuries (ISS ≤ 15)<sup>a</sup></b>    |                             |                                 |                          |              |
| Mortality, unadjusted                                 | 12.3%<br>[7.2, 16.8]        | 0.4%<br>[0.1, 0.6]              | 87.3%<br>[82.7, 92.6]    | 378,788      |
| Mortality, adjusted for casemix                       | 9.5%<br>[5.6, 13.1]         | 0.1%<br>[-0.1, 0.3]             | 90.4%<br>[86.7, 94.4]    | 371,287      |
| Length of Stay, unadjusted                            | 16.6%<br>[11.3, 21.3]       | 0.2%<br>[0.1, 0.2]              | 83.2%<br>[78.4, 88.5]    | 363,469      |
| Length of Stay, adjusted for casemix                  | 13.4%<br>[9.0, 17.4]        | 0.1%<br>[0.06, 0.1]             | 86.5%<br>[82.5, 90.9]    | 356,467      |
| Total Charges, unadjusted                             | 33.4%<br>[22.6, 41.6]       | 0.1%<br>[0.08, 0.2]             | 66.5%<br>[58.2, 77.3]    | 253,507      |
| Total Charges, adjusted for casemix                   | 30.3%<br>[20.3, 38.2]       | 0.3%<br>[0.2, 0.4]              | 69.4%<br>[61.5, 79.5]    | 250,555      |
| <b>More Severe Injuries (ISS &gt; 15)<sup>b</sup></b> |                             |                                 |                          |              |
| Mortality, unadjusted                                 | 4.8%<br>[1.2, 8.0]          | 0.4%<br>[-0.2, 1.1]             | 94.8%<br>[90.9, 99.0]    | 25,887       |
| Mortality, adjusted for casemix                       | 4.3%<br>[0.9, 7.4]          | 0.6%<br>[-0.1, 1.3]             | 95.1%<br>[91.3, 99.3]    | 25,883       |
| Length of Stay, unadjusted                            | 19.7%<br>[12.0, 26.4]       | 1.5%<br>[0.9, 2.2]              | 78.9%<br>[72.0, 86.8]    | 23,417       |
| Length of Stay, adjusted for casemix                  | 17.0%<br>[9.9, 23.3]        | 0.1%<br>[0.06, 1.6]             | 81.9%<br>[75.5, 89.3]    | 23,414       |

1  
2  
3  
4  
5  
6  
7  
8  
9  
10  
11  
12  
13  
14  
15  
16  
17  
18  
19  
20  
21  
22  
23  
24  
25  
26  
27  
28  
29  
30  
31  
32  
33  
34  
35  
36  
37  
38  
39  
40  
41  
42  
43  
44  
45  
46  
47  
48  
49  
50  
51  
52  
53  
54  
55  
56  
57  
58  
59  
60

|                                     |             |             |              |        |
|-------------------------------------|-------------|-------------|--------------|--------|
| Total Charges, unadjusted           | 17.2%       | 0.1%        | 81.8%        | 16,309 |
|                                     | [9.5, 24.1] | [0.04, 1.6] | [74.8, 89.8] |        |
| Total Charges, adjusted for casemix | 13.5%       | 0.5%        | 86.0%        | 16,306 |
|                                     | [7.2, 19.2] | [0.1, 0.8]  | [80.2, 92.5] |        |

NOTES: ICC Intraclass Correlation Coefficient; unadjusted models include random effects only, adjusted models include fixed effects for patient age, Injury Severity Scale (ISS), mechanism of injury, and number of patient comorbidities

<sup>a</sup> Hospital N = 66; ZIP Code N = 214

<sup>b</sup> Hospital N = 64; ZIP Code N = 212

Tables 5 and 6 present the stratified analyses by injury severity (Table 5) and mechanism of trauma (Table 6). There was significant variance at the hospital level across outcomes and trauma mechanism, although the extent of this variance ranged from 2.9% for mortality due to falls to 33.4% for total charges among less severe injuries. Again, there were no cases in which the unadjusted and case mix adjusted models differed significantly in the estimation of hospital ICC. Neighborhood variance was minimal across outcomes and mechanism as well, with the highest estimate being 1.6% for motor vehicle traffic mortality (after case mix adjustment).

Table 6. Variance decomposition statistics by selected injury mechanisms

|                                      | Hospital ICC<br>[95% CI] | Neighborhood ICC<br>[95% CI] | Residual ICC<br>[95% CI] | Patient N |
|--------------------------------------|--------------------------|------------------------------|--------------------------|-----------|
| <b>Falls<sup>a</sup></b>             |                          |                              |                          |           |
| Mortality, unadjusted                | 2.9%                     | 0.2%                         | 96.9%                    | 117,454   |
|                                      | [1.0, 4.7]               | [-0.2, 0.7]                  | [94.6, 99.3]             |           |
| Mortality, adjusted for casemix      | 2.4%                     | 0.0%                         | 97.6%                    | 117,454   |
|                                      | [2.4, 2.4]               | [0.0, 0.0]                   | [97.6, 97.6]             |           |
| Length of Stay, unadjusted           | 19.3%                    | 0.2%                         | 80.5%                    | 112,954   |
|                                      | [11.2, 26.2]             | [0.1, 0.3]                   | [73.6, 88.7]             |           |
| Length of Stay, adjusted for casemix | 13.5%                    | 0.1%                         | 86.4%                    | 112,915   |
|                                      | [7.3, 18.9]              | [0.06, 0.2]                  | [80.9, 92.6]             |           |
| Total Charges, unadjusted            | 22.5%                    | 0.09%                        | 77.4                     | 76,409    |
|                                      | [10.9, 31.7]             | [0.02, 0.2]                  | [67.2, 89.1]             |           |
| Total Charges, adjusted for casemix  | 24.0%                    | 0.04%                        | 75.9                     | 76,385    |
|                                      | [11.1, 33.8]             | [-0.006, 0.1]                | [66.1, 88.8]             |           |
| <b>Firearms<sup>b</sup></b>          |                          |                              |                          |           |
| Mortality, unadjusted                | 20.2%                    | 0.8%                         | 79.1%                    | 6,498     |
|                                      | [15.9, 32.9]             | [-2.9, 4.2]                  | [64.5, 101.9]            |           |
| Mortality, adjusted for casemix      | 16.4%                    | 1.5 %                        | 82.1%                    | 6,498     |
|                                      | [-0.6, 28.5]             | [-2.2, 4.9]                  | [68.1, 103.3]            |           |

|                                      |              |               |               |        |
|--------------------------------------|--------------|---------------|---------------|--------|
| Length of Stay, unadjusted           | 20.3%        | 0.0%          | 79.7%         | 2,970  |
|                                      | [6.7, 30.4]  | [0.0, 0.0]    | [69.6, 93.3]  |        |
| Length of Stay, adjusted for casemix | 12.6%        | 0.2%          | 87.1%         | 5,857  |
|                                      | [4.9, 19.7]  | [-0.2, 0.8]   | [79.8, 95.2]  |        |
| Total Charges, unadjusted            | 12.2%        | 0.2%          | 87.6%         | 5,858  |
|                                      | [5.0, 18.8]  | [-0.2, 0.6]   | [80.8, 95.1]  |        |
| Total Charges, adjusted for casemix  | 21.3%        | 0.07%         | 78.6%         | 2,970  |
|                                      | [5.8, 33.6]  | [-0.4, 0.8]   | [66.2, 94.7]  |        |
| Motor Vehicle <sup>c</sup>           |              |               |               |        |
| Mortality, unadjusted                | 4.7%         | 1.1%          | 94.2%         | 22,604 |
|                                      | [-0.8, 9.7]  | [-1.1, 3.4]   | [87.3, 101.9] |        |
| Mortality, adjusted for casemix      | 2.7%         | 1.6%          | 95.6%         | 22,604 |
|                                      | [-0.4, 5.7]  | [-1.0, 4.2]   | [90.4, 101.5] |        |
| Length of Stay, unadjusted           | 13.0%        | 0.3%          | 86.7%         | 21,082 |
|                                      | [6.0, 19.2]  | [0.1, 0.6]    | [80.3, 93.8]  |        |
| Length of Stay, adjusted for casemix | 14.5%        | 0.2%          | 85.3%         | 21,057 |
|                                      | [7.0, 21.2]  | [-0.002, 0.4] | [78.6, 93.0]  |        |
| Total Charges, unadjusted            | 19.6%        | 0.6%          | 79.8%         | 12,430 |
|                                      | [10.0, 27.7] | [0.2, 1.2]    | [71.5, 89.7]  |        |
| Total Charges, adjusted for casemix  | 18.3%        | 0.5%          | 81.1%         | 12,418 |
|                                      | [8.9, 26.4]  | [0.2, 1.0]    | [73.0, 90.8]  |        |

NOTES: ICC Intraclass Correlation Coefficient; unadjusted models include random effects only, adjusted models include fixed effects for patient age, Injury Severity Scale (ISS), mechanism of injury, and number of patient comorbidities

<sup>a</sup> Hospital N = 65; ZIP Code N = 213

<sup>b</sup> Hospital N = 52; ZIP Code N = 178

<sup>c</sup> Hospital N = 65; ZIP Code N = 211

Sensitivity analyses were conducted to evaluate whether the decision to exclude cases with in-hospital mortality from the LOS and total charges. No significant differences were detected in any ICC statistics between analyses conducted with and without these cases.

## DISCUSSION

The persistence of disparities in health outcomes is an important concern for public policy makers and for hospital administrators. These results reflect a growing literature finding substantial between-hospital differences in outcomes for injured patients, related to hospital factors including patient volume<sup>25</sup>, trauma level designation<sup>26</sup>, and treatment efficiency<sup>27</sup>. This analysis addresses two important issues. First, the extent of disparity in outcomes from trauma



1  
2  
3 treatment has received relatively little attention, with most research focusing primarily on  
4  
5 treatment of acute and chronic disease. Second, a longstanding question has been the relative  
6  
7 importance of placement of care facilities versus neighborhood risk factors and individual  
8  
9 differences in creating patterns of geographic health inequality – i.e., do marginalized  
10  
11 neighborhoods suffer because they have access to hospitals that have worse outcomes; because  
12  
13 they exhibit environmental risk factors like exposure to greater violence, more toxic substances,  
14  
15 and generally unsanitary and stressful conditions; or because their populations have other  
16  
17 underlying risk factors, like higher rates of chronic disease and lower levels of insurance  
18  
19 coverage, unrelated to specific neighborhood conditions.  
20  
21  
22

23  
24 With respect to the first question, these results suggest that there are substantial  
25  
26 disparities in trauma outcomes related to factors outside of the facts of the trauma case and  
27  
28 individual differences in trauma patients. Ideally, these individual factors (represented here as  
29  
30 part of the residual variance) should account for all of the variance in outcomes – patient  
31  
32 outcomes should be equal across hospitals and across neighborhoods. Regarding the second  
33  
34 question, these data indicate that identifiable inequalities account for between 2% and 33% of  
35  
36 outcomes, depending on the outcome and trauma type examined. They also suggest that most of  
37  
38 these disparities in trauma outcomes appear to be due to hospital-level disparities, with the  
39  
40 independent influence of neighborhood being comparatively trivial. This lends support to the  
41  
42 view that geographic disparities in trauma outcomes (at least within the specific context of the  
43  
44 Detroit metropolitan area) seem to be mainly due to differences in care provided by facilities  
45  
46 available in these areas.  
47  
48  
49

50  
51 Comparative analyses based on neighborhood poverty levels and injury severity  
52  
53 illustrates some potentially confounding factors. For example, patients living in high-poverty  
54  
55  
56  
57  
58  
59

1  
2  
3 neighborhoods are at higher risk for negative outcomes in some regards – particularly in terms of  
4 incidence of firearm injuries – but they are also substantially younger on average, and thus may  
5 suffer from fewer risks related to comorbid conditions, which tend to increase with age.  
6  
7

8  
9  
10 Hospital-level disparities in outcomes remained after stratifying the analyses by injury severity  
11 and by mechanism of injury, as well as after controlling for some individual and case-level risk  
12 factors (including age, injury severity, and comorbidity). This suggests that the differences  
13 between hospitals are not solely based on different background case characteristics. Although  
14 there are clearly disparities in terms of risk for different types of injury based on geographic  
15 location, these differences in case mix do not appear to fully explain differences in hospital  
16 outcomes. Nevertheless, it remains likely that different patient populations with different risk  
17 profiles play an important role in some fraction of the inter-hospital variability seen here.  
18  
19

20  
21 Although it is beyond the scope of a single study to identify all of these factors, it remains an  
22 important area for focus in future research.  
23  
24

25  
26  
27  
28  
29  
30  
31  
32  
33  
34  
35  
36  
37  
38  
39  
40  
41  
42  
43  
44  
45  
46  
47  
48  
49  
50  
51  
52  
53  
54  
55  
56  
57  
58  
59  
60  
61  
62  
63  
64  
65  
66  
67  
68  
69  
70  
71  
72  
73  
74  
75  
76  
77  
78  
79  
80  
81  
82  
83  
84  
85  
86  
87  
88  
89  
90  
91  
92  
93  
94  
95  
96  
97  
98  
99  
100  
101  
102  
103  
104  
105  
106  
107  
108  
109  
110  
111  
112  
113  
114  
115  
116  
117  
118  
119  
120  
121  
122  
123  
124  
125  
126  
127  
128  
129  
130  
131  
132  
133  
134  
135  
136  
137  
138  
139  
140  
141  
142  
143  
144  
145  
146  
147  
148  
149  
150  
151  
152  
153  
154  
155  
156  
157  
158  
159  
160  
161  
162  
163  
164  
165  
166  
167  
168  
169  
170  
171  
172  
173  
174  
175  
176  
177  
178  
179  
180  
181  
182  
183  
184  
185  
186  
187  
188  
189  
190  
191  
192  
193  
194  
195  
196  
197  
198  
199  
200  
201  
202  
203  
204  
205  
206  
207  
208  
209  
210  
211  
212  
213  
214  
215  
216  
217  
218  
219  
220  
221  
222  
223  
224  
225  
226  
227  
228  
229  
230  
231  
232  
233  
234  
235  
236  
237  
238  
239  
240  
241  
242  
243  
244  
245  
246  
247  
248  
249  
250  
251  
252  
253  
254  
255  
256  
257  
258  
259  
260  
261  
262  
263  
264  
265  
266  
267  
268  
269  
270  
271  
272  
273  
274  
275  
276  
277  
278  
279  
280  
281  
282  
283  
284  
285  
286  
287  
288  
289  
290  
291  
292  
293  
294  
295  
296  
297  
298  
299  
300  
301  
302  
303  
304  
305  
306  
307  
308  
309  
310  
311  
312  
313  
314  
315  
316  
317  
318  
319  
320  
321  
322  
323  
324  
325  
326  
327  
328  
329  
330  
331  
332  
333  
334  
335  
336  
337  
338  
339  
340  
341  
342  
343  
344  
345  
346  
347  
348  
349  
350  
351  
352  
353  
354  
355  
356  
357  
358  
359  
360  
361  
362  
363  
364  
365  
366  
367  
368  
369  
370  
371  
372  
373  
374  
375  
376  
377  
378  
379  
380  
381  
382  
383  
384  
385  
386  
387  
388  
389  
390  
391  
392  
393  
394  
395  
396  
397  
398  
399  
400  
401  
402  
403  
404  
405  
406  
407  
408  
409  
410  
411  
412  
413  
414  
415  
416  
417  
418  
419  
420  
421  
422  
423  
424  
425  
426  
427  
428  
429  
430  
431  
432  
433  
434  
435  
436  
437  
438  
439  
440  
441  
442  
443  
444  
445  
446  
447  
448  
449  
450  
451  
452  
453  
454  
455  
456  
457  
458  
459  
460  
461  
462  
463  
464  
465  
466  
467  
468  
469  
470  
471  
472  
473  
474  
475  
476  
477  
478  
479  
480  
481  
482  
483  
484  
485  
486  
487  
488  
489  
490  
491  
492  
493  
494  
495  
496  
497  
498  
499  
500  
501  
502  
503  
504  
505  
506  
507  
508  
509  
510  
511  
512  
513  
514  
515  
516  
517  
518  
519  
520  
521  
522  
523  
524  
525  
526  
527  
528  
529  
530  
531  
532  
533  
534  
535  
536  
537  
538  
539  
540  
541  
542  
543  
544  
545  
546  
547  
548  
549  
550  
551  
552  
553  
554  
555  
556  
557  
558  
559  
560  
561  
562  
563  
564  
565  
566  
567  
568  
569  
570  
571  
572  
573  
574  
575  
576  
577  
578  
579  
580  
581  
582  
583  
584  
585  
586  
587  
588  
589  
590  
591  
592  
593  
594  
595  
596  
597  
598  
599  
600  
601  
602  
603  
604  
605  
606  
607  
608  
609  
610  
611  
612  
613  
614  
615  
616  
617  
618  
619  
620  
621  
622  
623  
624  
625  
626  
627  
628  
629  
630  
631  
632  
633  
634  
635  
636  
637  
638  
639  
640  
641  
642  
643  
644  
645  
646  
647  
648  
649  
650  
651  
652  
653  
654  
655  
656  
657  
658  
659  
660  
661  
662  
663  
664  
665  
666  
667  
668  
669  
670  
671  
672  
673  
674  
675  
676  
677  
678  
679  
680  
681  
682  
683  
684  
685  
686  
687  
688  
689  
690  
691  
692  
693  
694  
695  
696  
697  
698  
699  
700  
701  
702  
703  
704  
705  
706  
707  
708  
709  
710  
711  
712  
713  
714  
715  
716  
717  
718  
719  
720  
721  
722  
723  
724  
725  
726  
727  
728  
729  
730  
731  
732  
733  
734  
735  
736  
737  
738  
739  
740  
741  
742  
743  
744  
745  
746  
747  
748  
749  
750  
751  
752  
753  
754  
755  
756  
757  
758  
759  
760  
761  
762  
763  
764  
765  
766  
767  
768  
769  
770  
771  
772  
773  
774  
775  
776  
777  
778  
779  
780  
781  
782  
783  
784  
785  
786  
787  
788  
789  
790  
791  
792  
793  
794  
795  
796  
797  
798  
799  
800  
801  
802  
803  
804  
805  
806  
807  
808  
809  
810  
811  
812  
813  
814  
815  
816  
817  
818  
819  
820  
821  
822  
823  
824  
825  
826  
827  
828  
829  
830  
831  
832  
833  
834  
835  
836  
837  
838  
839  
840  
841  
842  
843  
844  
845  
846  
847  
848  
849  
850  
851  
852  
853  
854  
855  
856  
857  
858  
859  
860  
861  
862  
863  
864  
865  
866  
867  
868  
869  
870  
871  
872  
873  
874  
875  
876  
877  
878  
879  
880  
881  
882  
883  
884  
885  
886  
887  
888  
889  
890  
891  
892  
893  
894  
895  
896  
897  
898  
899  
900  
901  
902  
903  
904  
905  
906  
907  
908  
909  
910  
911  
912  
913  
914  
915  
916  
917  
918  
919  
920  
921  
922  
923  
924  
925  
926  
927  
928  
929  
930  
931  
932  
933  
934  
935  
936  
937  
938  
939  
940  
941  
942  
943  
944  
945  
946  
947  
948  
949  
950  
951  
952  
953  
954  
955  
956  
957  
958  
959  
960  
961  
962  
963  
964  
965  
966  
967  
968  
969  
970  
971  
972  
973  
974  
975  
976  
977  
978  
979  
980  
981  
982  
983  
984  
985  
986  
987  
988  
989  
990  
991  
992  
993  
994  
995  
996  
997  
998  
999  
1000

These findings suggest that, at least in the case of trauma outcomes, policy should focus on reducing disparities in treatment quality between hospitals in order to reduce community-level disparities in outcomes. More broadly, it suggests that factors influencing geographic disparities in trauma outcomes may arise at the point of treatment, rather than being the result of different levels of risk derived from the neighborhood environment, at least when considered within a single metropolitan area. Disparities in treatment quality may have a number of causes, including differences in investment, differences in resource allocation, and differences in institutional experience with treating trauma. In addition to addressing funding and investment disparities, ways of addressing these differences might include transferring high risk cases to hospitals with more extensive institutional experience in the relevant field.

1  
2  
3 Limitations of this study include the inherent inability to fully differentiate hospital-level  
4 variance that may be caused by differences in the patient population served at different  
5 institutions. Although the adjusted models partially account for some the most plausible of these  
6 factors, including injury severity and mechanism, as well as patient age and comorbidities, it is  
7 not possible to control for all factors that may contribute to disparities in case mix between  
8 hospitals. Additionally, our data did not include information on pre-hospital mortality, which has  
9 been identified in previous research as a critical phase for trauma management<sup>28</sup>. Since there is  
10 the potential for significant inequalities in pre-hospital care, for example due to geographical  
11 differences in response times, this is an important element of the trauma care system to address  
12 in future research on disparities. Although sensitivity analyses indicated that loss of cases with  
13 mortality did not significantly affect the results of the LOS and charge analyses, the problem of  
14 dealing with right-censored data remains a limitation. Other shortcomings include a lack of  
15 hospital-level data, including trauma level designation, due to limitations on the Michigan SID  
16 data aimed at preserving institutional anonymity. Charge data must be interpreted with some  
17 caution, because charges billed do not necessarily reflect hospital costs, and can vary between  
18 regions based on a variety of factors unrelated to care<sup>29</sup>. Finally, the use of ZIP code as a proxy  
19 for neighborhood (although necessary in this case because of a lack of alternate geographic  
20 identifiers in the data) presents limitations, because ZIP codes reflect administrative divisions  
21 that do not necessarily reflect the realities of the social geography in which they are situated;  
22 they may divide or combine genuine neighborhoods, limiting their usefulness as indicators of  
23 residential conditions. Alternative ways of identifying neighborhood clusters other than ZIP code  
24 (e.g., census tracts, or homogeneous ZIP code groups) might yield more accurate information  
25  
26  
27  
28  
29  
30  
31  
32  
33  
34  
35  
36  
37  
38  
39  
40  
41  
42  
43  
44  
45  
46  
47  
48  
49  
50  
51  
52  
53  
54  
55  
56  
57  
58  
59  
60

1  
2  
3 regarding neighborhood variation. Future research should seek to create and validate better  
4  
5 methods of defining neighborhoods.  
6

7  
8 As policy-makers look for ways to reduce both disparities in trauma outcomes and the  
9  
10 cost of providing care for traumatic injury, it is important to have a clear picture of the extent to  
11  
12 which they differ as a function of local geography. This study represents a step towards  
13  
14 addressing that question, indicating that differences between hospitals may play an important  
15  
16 role in determining the extent of these differences.  
17  
18  
19  
20  
21  
22  
23  
24  
25  
26  
27  
28  
29  
30  
31  
32  
33  
34  
35  
36  
37  
38  
39  
40  
41  
42  
43  
44  
45  
46  
47  
48  
49  
50  
51  
52  
53  
54  
55  
56  
57  
58  
59  
60

1  
2  
3 CONFLICT OF INTEREST STATEMENT:  
4

5 The authors have no conflicting interests to declare.  
6

7  
8 AUTHOR CONTRIBUTIONS  
9

10 LS, RH, and MF drafted the manuscript. RH conducted the statistical analyses. LS and EE  
11 developed the research questions. All authors reviewed and revised the manuscript.  
12  
13

14  
15 DATA STATEMENT  
16

17 Data from the State Inpatient Database (SID for the state of Michigan for the years 2006 – 2014  
18 were obtained from the Agency for Health Research and Quality's (AHRQ) Healthcare Cost and  
19 Utilization Project (HCUP). These data are available for purchase from AHRQ at  
20  
21  
22  
23  
24 <http://www.hcup-us.ahrq.gov/>  
25

26  
27 FUNDING  
28

29 This research received no specific grant from any funding agency in the public, commercial or  
30 not-for-profit sectors.  
31  
32  
33  
34  
35  
36  
37  
38  
39  
40  
41  
42  
43  
44  
45  
46  
47  
48  
49  
50  
51  
52  
53  
54  
55  
56  
57  
58  
59  
60

## References

1. Adler, N. E. & Rehkopf, D. H. U.S. Disparities in Health: Descriptions, Causes, and Mechanisms. *Annu. Rev. Public Health* **29**, 235–252 (2008).
2. Howell, E. A., Hebert, P., Chatterjee, S., Kleinman, L. C. & Chassin, M. R. Black/white differences in very low birth weight neonatal mortality rates among New York City hospitals. *Pediatrics* **121**, e407–e415 (2008).
3. Freedman, V. A., Martin, L. G. & Schoeni, R. F. Recent trends in disability and functioning among older adults in the united states: A systematic review. *J. Am. Med. Assoc.* **288**, 3137–3146 (2002).
4. Juarez, P. D. *et al.* The public health exposome: a population-based, exposure science approach to health disparities research. *Int. J. Environ. Res. Public. Health* **11**, 12866–12895 (2014).
5. Jackson, J. S., Knight, K. M. & Rafferty, J. A. Race and Unhealthy Behaviors: Chronic Stress, the HPA Axis, and Physical and Mental Health Disparities Over the Life Course. *Am. J. Public Health* **100**, 933–939 (2010).
6. Dimick, J., Ruhter, J., Sarrazin, M. V. & Birkmeyer, J. D. Black patients more likely than whites to undergo surgery at low-quality hospitals in segregated regions. *Health Aff. (Millwood)* **32**, 1046–1053 (2013).
7. Haider, A. H. *et al.* Disparities in trauma care and outcomes in the United States: A systematic review and meta-analysis. *J. Trauma Acute Care Surg.* **74**, 1195–1205 (2013).
8. Maybury, R. S. *et al.* Pedestrians struck by motor vehicles further worsen race- and insurance-based disparities in trauma outcomes: The case for inner-city pedestrian injury prevention programs. *Surgery* **148**, 202–208 (2010).

- 1  
2  
3 9. Reimers, A. & Laflamme, L. Hip Fractures Among the Elderly: Personal and Contextual  
4  
5 Social Factors That Matter. *J. Trauma Acute Care Surg.* **62**, 365–369 (2007).  
6
- 7  
8 10. Corrigan, J. D. & Bogner, J. A. Neighborhood Characteristics and Outcomes After  
9  
10 Traumatic Brain Injury. *Arch. Phys. Med. Rehabil.* **89**, 912–921 (2008).  
11
- 12  
13 11. Iceland, J. & Sharp, G. White Residential Segregation in U.S. Metropolitan Areas:  
14  
15 Conceptual Issues, Patterns, and Trends from the U.S. Census, 1980 to 2010. *Popul. Res.*  
16  
17 *Policy Rev.* **32**, 663–686 (2013).  
18
- 19  
20 12. Bergeron, E., Lavoie, A., Moore, L., Clas, D. & Rossignol, M. Comorbidity and age are  
21  
22 both independent predictors of length of hospitalization in trauma patients. *Can. J. Surg.* **48**,  
23  
24 361 (2005).  
25
- 26  
27 13. Moore, L. *et al.* Using information on preexisting conditions to predict mortality from  
28  
29 traumatic injury. *Ann. Emerg. Med.* **52**, 356–364.e2 (2008).  
30
- 31  
32 14. Tsai, T. C., Orav, E. J. & Jha, A. K. Patient Satisfaction and Quality of Surgical Care in  
33  
34 US Hospitals. *Ann. Surg.* **261**, 2–8 (2015).  
35
- 36  
37 15. Hasnain-Wynia, R., Baker, Nerenz, D. & *et al.* Disparities in health care are driven by  
38  
39 where minority patients seek care: Examination of the hospital quality alliance measures.  
40  
41 *Arch. Intern. Med.* **167**, 1233–1239 (2007).  
42
- 43  
44 16. Vettukattil, A. S. *et al.* Do Trauma Safety-Net Hospitals Deliver Truly Safe Trauma  
45  
46 Care? A Multilevel Analysis of the National Trauma Data Bank. *J. Trauma Acute Care Surg.*  
47  
48 **70**, 978–984 (2011).  
49
- 50  
51 17. Darden, J., Rahbar, M., Jezierski, L., Li, M. & Velie, E. The Measurement of  
52  
53 Neighborhood Socioeconomic Characteristics and Black and White Residential Segregation in  
54  
55  
56  
57  
58  
59  
60

- 1  
2  
3 Metropolitan Detroit: Implications for the Study of Social Disparities in Health. *Ann. Assoc.*  
4  
5 *Am. Geogr.* **100**, 137–158 (2010).  
6  
7
- 8 18. Healthcare Cost and Utilization Project (HCUP). *HCUP State Inpatient Databases (SID)*.  
9  
10 (Agency for Healthcare Research and Quality, 2006).  
11
- 12 19. Clark, D. E., Black, A. W., Skavdahl, D. H. & Hallagan, L. D. Open-access programs for  
13  
14 injury categorization using ICD-9 or ICD-10. *Inj. Epidemiol.* **5**, 11 (2018).  
15
- 16 20. Sears, J. M., Blonar, L. & Bowman, S. M. Predicting work-related disability and medical  
17  
18 cost outcomes: A comparison of injury severity scoring methods. *Injury* **45**, 16–22 (2014).  
19
- 20 21. Greene, N. H., Kernic, M. A., Vavilala, M. S. & Rivara, F. P. Validation of ICDPIC  
21  
22 software injury severity scores using a large regional trauma registry. *Inj. Prev.* **21**, 325  
23  
24 (2015).  
25
- 26 22. U. S. Census Bureau. *American FactFinder*. (2014).  
27
- 28 23. Brown, H. & Prescott, R. *Applied mixed models in medicine*. (John Wiley & Sons, 2014).  
29
- 30 24. Nakagawa, S., Johnson, P. C. D. & Schielzeth, H. The coefficient of determination R<sup>2</sup>  
31  
32 and intra-class correlation coefficient from generalized linear mixed-effects models revisited  
33  
34 and expanded. *J. R. Soc. Interface* **14**, (2017).  
35
- 36 25. Nathens AB, Jurkovich GJ, Maier RV & et al. Relationship between trauma center  
37  
38 volume and outcomes. *JAMA* **285**, 1164–1171 (2001).  
39
- 40 26. Demetriades, D. *et al.* The effect of trauma center designation and trauma volume on  
41  
42 outcome in specific severe injuries. *Ann. Surg.* **242**, 512–519 (2005).  
43
- 44 27. Novack, V., Jotkowitz, A., Etzion, O. & Porath, A. Does delay in surgery after hip  
45  
46 fracture lead to worse outcomes? A multicenter survey. *Int. J. Qual. Health Care* **19**, 170–176  
47  
48 (2007).  
49
- 50  
51  
52  
53  
54  
55  
56  
57  
58  
59  
60



- 1  
2  
3 28. Kleber, C. *et al.* Overall Distribution of Trauma-related Deaths in Berlin 2010:  
4  
5 Advancement or Stagnation of German Trauma Management? *World J. Surg.* **36**, 2125–2130  
6  
7 (2012).  
8  
9  
10 29. Wakeam, E. *et al.* Variation in the cost of 5 common operations in the United States.  
11  
12 *Surgery* **162**, 592–604 (2017).  
13  
14  
15  
16  
17  
18  
19  
20  
21  
22  
23  
24  
25  
26  
27  
28  
29  
30  
31  
32  
33  
34  
35  
36  
37  
38  
39  
40  
41  
42  
43  
44  
45  
46  
47  
48  
49  
50  
51  
52  
53  
54  
55  
56  
57  
58  
59  
60

## STROBE Statement—checklist of items that should be included in reports of observational studies

|                              | <b>Item No</b> | <b>Recommendation</b>                                                                                                                                                                                                                                                                                                                                                                            |
|------------------------------|----------------|--------------------------------------------------------------------------------------------------------------------------------------------------------------------------------------------------------------------------------------------------------------------------------------------------------------------------------------------------------------------------------------------------|
| <b>Title and abstract</b>    | 1              | (a) Indicate the study's design with a commonly used term in the title or the abstract<br><b>Page 1</b><br>(b) Provide in the abstract an informative and balanced summary of what was done and what was found<br><b>Page 2</b>                                                                                                                                                                  |
| <b>Introduction</b>          |                |                                                                                                                                                                                                                                                                                                                                                                                                  |
| Background/rationale         | 2              | Explain the scientific background and rationale for the investigation being reported<br><b>Pages 1 – 5</b>                                                                                                                                                                                                                                                                                       |
| Objectives                   | 3              | State specific objectives, including any prespecified hypotheses<br><b>Page 5</b>                                                                                                                                                                                                                                                                                                                |
| <b>Methods</b>               |                |                                                                                                                                                                                                                                                                                                                                                                                                  |
| Study design                 | 4              | Present key elements of study design early in the paper<br><b>Pages 5 – 7</b>                                                                                                                                                                                                                                                                                                                    |
| Setting                      | 5              | Describe the setting, locations, and relevant dates, including periods of recruitment, exposure, follow-up, and data collection<br><b>Pages 5 – 6</b>                                                                                                                                                                                                                                            |
| Participants                 | 6              | (a) <i>Cross-sectional study</i> —Give the eligibility criteria, and the sources and methods of selection of participants<br><b>Pages 5 – 6</b>                                                                                                                                                                                                                                                  |
| Variables                    | 7              | Clearly define all outcomes, exposures, predictors, potential confounders, and effect modifiers. Give diagnostic criteria, if applicable<br><b>Page 6</b>                                                                                                                                                                                                                                        |
| Data sources/<br>measurement | 8*             | For each variable of interest, give sources of data and details of methods of assessment (measurement). Describe comparability of assessment methods if there is more than one group<br><b>Pages 5 – 6</b>                                                                                                                                                                                       |
| Bias                         | 9              | Describe any efforts to address potential sources of bias<br><b>Page 7</b>                                                                                                                                                                                                                                                                                                                       |
| Study size                   | 10             | Explain how the study size was arrived at<br><b>Page 8</b>                                                                                                                                                                                                                                                                                                                                       |
| Quantitative variables       | 11             | Explain how quantitative variables were handled in the analyses. If applicable, describe which groupings were chosen and why<br><b>Pages 6 – 7</b>                                                                                                                                                                                                                                               |
| Statistical methods          | 12             | (a) Describe all statistical methods, including those used to control for confounding<br><b>Page 7</b><br>(b) Describe any methods used to examine subgroups and interactions<br><b>Page 7</b><br>(c) Explain how missing data were addressed<br><b>Page 7</b><br>(d) <i>Cross-sectional study</i> —If applicable, describe analytical methods taking account of sampling strategy<br><b>N/A</b> |

(e) Describe any sensitivity analyses

N/A

Continued on next page

**Results**

|                  |     |                                                                                                                                                                                                                            |
|------------------|-----|----------------------------------------------------------------------------------------------------------------------------------------------------------------------------------------------------------------------------|
| Participants     | 13* | (a) Report numbers of individuals at each stage of study—eg numbers potentially eligible, examined for eligibility, confirmed eligible, included in the study, completing follow-up, and analysed<br><b>Page 8</b>         |
|                  |     | (b) Give reasons for non-participation at each stage<br><b>N/A</b>                                                                                                                                                         |
|                  |     | (c) Consider use of a flow diagram<br><b>N/A</b>                                                                                                                                                                           |
| Descriptive data | 14* | (a) Give characteristics of study participants (eg demographic, clinical, social) and information on exposures and potential confounders<br><b>Page 8</b>                                                                  |
|                  |     | (b) Indicate number of participants with missing data for each variable of interest<br><b>Table 1</b>                                                                                                                      |
| Outcome data     | 15* | <i>Cross-sectional study</i> —Report numbers of outcome events or summary measures<br><b>Table 1</b>                                                                                                                       |
| Main results     | 16  | (a) Give unadjusted estimates and, if applicable, confounder-adjusted estimates and their precision (eg, 95% confidence interval). Make clear which confounders were adjusted for and why they were included<br><b>N/A</b> |
|                  |     | (b) Report category boundaries when continuous variables were categorized<br><b>N/A</b>                                                                                                                                    |
|                  |     | (c) If relevant, consider translating estimates of relative risk into absolute risk for a meaningful time period<br><b>N/A</b>                                                                                             |
| Other analyses   | 17  | Report other analyses done—eg analyses of subgroups and interactions, and sensitivity analyses<br><b>Page 8 &amp; Table 1</b>                                                                                              |

**Discussion**

|                  |    |                                                                                                                                                                                                   |
|------------------|----|---------------------------------------------------------------------------------------------------------------------------------------------------------------------------------------------------|
| Key results      | 18 | Summarise key results with reference to study objectives<br><b>Page 9</b>                                                                                                                         |
| Limitations      | 19 | Discuss limitations of the study, taking into account sources of potential bias or imprecision. Discuss both direction and magnitude of any potential bias<br><b>Page 10</b>                      |
| Interpretation   | 20 | Give a cautious overall interpretation of results considering objectives, limitations, multiplicity of analyses, results from similar studies, and other relevant evidence<br><b>Pages 9 – 10</b> |
| Generalisability | 21 | Discuss the generalisability (external validity) of the study results<br><b>Page 9</b>                                                                                                            |

**Other information**

|         |    |                                                                                                  |
|---------|----|--------------------------------------------------------------------------------------------------|
| Funding | 22 | Give the source of funding and the role of the funders for the present study and, if applicable, |
|---------|----|--------------------------------------------------------------------------------------------------|

1  
2 for the original study on which the present article is based

3 N/A

4  
5 \*Give information separately for cases and controls in case-control studies and, if applicable, for exposed and  
6 unexposed groups in cohort and cross-sectional studies.  
7

8  
9 **Note:** An Explanation and Elaboration article discusses each checklist item and gives methodological background and  
10 published examples of transparent reporting. The STROBE checklist is best used in conjunction with this article (freely  
11 available on the Web sites of PLoS Medicine at <http://www.plosmedicine.org/>, Annals of Internal Medicine at  
12 <http://www.annals.org/>, and Epidemiology at <http://www.epidem.com/>). Information on the STROBE Initiative is  
13 available at [www.strobe-statement.org](http://www.strobe-statement.org).  
14  
15  
16  
17  
18  
19  
20  
21  
22  
23  
24  
25  
26  
27  
28  
29  
30  
31  
32  
33  
34  
35  
36  
37  
38  
39  
40  
41  
42  
43  
44  
45  
46  
47  
48  
49  
50  
51  
52  
53  
54  
55  
56  
57  
58  
59  
60
